# Supplementary material for: Psychometric evaluation of the modified Kessler seven-item version (K7) for measuring psychological distress using Rasch analysis: a cross-sectional study in a rural district of Bangladesh
Source: PubMed Central journal article supplement — BMJ Open. 2020 Feb 20;10(2):e034523. doi: 10.1136/bmjopen-2019-034523 (PMC7045185; doi:10.1136/bmjopen-2019-034523), 2020-02-20
Supplement: bmjopen-2019-034523.draft_revisions.pdf [file bmjopen-2019-034523.draft_revisions.pdf]

# BMJ Open

BMJ Open is committed to open peer review. As part of this commitment we make the peer review history of every article we publish publicly available.

When an article is published we post the peer reviewers' comments and the authors' responses online. We also post the versions of the paper that were used during peer review. These are the versions that the peer review comments apply to.

The versions of the paper that follow are the versions that were submitted during the peer review process. They are not the versions of record or the final published versions. They should not be cited or distributed as the published version of this manuscript.

BMJ Open is an open access journal and the full, final, typeset and author-corrected version of record of the manuscript is available on our site with no access controls, subscription charges or pay-per-view fees (<http://bmjopen.bmj.com>).

If you have any questions on BMJ Open's open peer review process please email [info.bmjopen@bmj.com](mailto:info.bmjopen@bmj.com)

# BMJ Open

**Further validation of psychometric evaluation of the modified Kessler seven-item questionnaire (K7) for measuring psychological distress in rural Bangladesh. A cross-sectional study**

|                               |                                                                                                                                                                                                              |
|-------------------------------|--------------------------------------------------------------------------------------------------------------------------------------------------------------------------------------------------------------|
| Journal:                      | <i>BMJ Open</i>                                                                                                                                                                                              |
| Manuscript ID                 | bmjopen-2019-034523                                                                                                                                                                                          |
| Article Type:                 | Original research                                                                                                                                                                                            |
| Date Submitted by the Author: | 24-Sep-2019                                                                                                                                                                                                  |
| Complete List of Authors:     | Uddin, Mohammed ; Swinburne University of Technology, Department of Statistics, Data science and Epidemiology<br>Islam, Fakir; Swinburne University of Technology, Statistics, Data Science and Epidemiology |
| Keywords:                     | Kessler psychological distress scale, Rasch analysis, Validation, Rural Bangladesh, K7                                                                                                                       |
|                               |                                                                                                                                                                                                              |

SCHOLARONE™  
Manuscripts

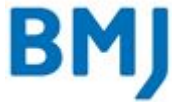

I, the Submitting Author has the right to grant and does grant on behalf of all authors of the Work (as defined in the below author licence), an exclusive licence and/or a non-exclusive licence for contributions from authors who are: i) UK Crown employees; ii) where BMJ has agreed a CC-BY licence shall apply, and/or iii) in accordance with the terms applicable for US Federal Government officers or employees acting as part of their official duties; on a worldwide, perpetual, irrevocable, royalty-free basis to BMJ Publishing Group Ltd ("BMJ") its licensees and where the relevant Journal is co-owned by BMJ to the co-owners of the Journal, to publish the Work in this journal and any other BMJ products and to exploit all rights, as set out in our [licence](#).

The Submitting Author accepts and understands that any supply made under these terms is made by BMJ to the Submitting Author unless you are acting as an employee on behalf of your employer or a postgraduate student of an affiliated institution which is paying any applicable article publishing charge ("APC") for Open Access articles. Where the Submitting Author wishes to make the Work available on an Open Access basis (and intends to pay the relevant APC), the terms of reuse of such Open Access shall be governed by a Creative Commons licence – details of these licences and which [Creative Commons](#) licence will apply to this Work are set out in our licence referred to above.

Other than as permitted in any relevant BMJ Author's Self Archiving Policies, I confirm this Work has not been accepted for publication elsewhere, is not being considered for publication elsewhere and does not duplicate material already published. I confirm all authors consent to publication of this Work and authorise the granting of this licence.

1  
2 1 **Title: Further validation of psychometric evaluation of the modified Kessler seven-item**  
3  
4 2 **questionnaire (K7) for measuring psychological distress in rural Bangladesh. A cross-sectional**  
5  
6 3 **study**  
7  
8  
9 4

10  
11 5 Mohammed Nazim Uddin<sup>1</sup>, Fakir M Amirul Islam<sup>1,2</sup>  
12

- 13 6 1. Department of Statistics, Data Science and Epidemiology; Faculty of Health, Arts and Design;  
14  
15 Swinburne University of Technology, Hawthorn VIC 3122, Australia  
16 7  
17 2. Organisation for Rural Community Development, Dariapur, Narail, Bangladesh  
18 8  
19  
20 9

21  
22 10 Email: Mohammed Nazim Uddin – [mnuddin@swin.edu.au](mailto:mnuddin@swin.edu.au); Fakir M Amirul Islam –  
23  
24 [fislam@swin.edu.au](mailto:fislam@swin.edu.au)  
25 11

26  
27 12  
28  
29 13 \*Corresponding author:  
30

31  
32 14 Email: [mnuddin@swin.edu.au](mailto:mnuddin@swin.edu.au)  
33  
34 15  
35  
36 16  
37  
38  
39 17  
40  
41 18  
42  
43 19  
44  
45 20  
46  
47  
48 21  
49  
50 22  
51  
52 23  
53  
54  
55 24  
56  
57

1  
2 25 **Word Count (3427)**

3  
4 26 **Abstract**

5  
6 27 **Objectives** This investigation expected to approve the psychometric properties of the modified 7-items  
7  
8 28 Kessler psychological distress scale (K7) for measuring psychological distress in rural Bangladesh.

9  
10  
11 29 **Design** Cross-sectional study.

12  
13 30 **Setting** Narail district, Bangladesh.

14  
15  
16 31 **Participants** A random sample of 300 adults of age 18–90 years was recruited in July-August 2018 using  
17  
18 32 mobile data collection tools (CommCare)

19  
20 33 **Outcome measure** Validation of the K7 was the major outcome. Sociodemographic factors were  
21  
22 34 measured to assess for DIF adjustment. Rasch analysis was carried out for further validation of the  
23  
24 35 modified K7 version was applied among different cohort for potential use in clinical settings. SPSS25  
25  
26 36 and RUMM2030 was used for analyses.

27  
28  
29 37 **Results:** Results showed good overall fit, as indicated by a non-significant item-trait interaction ( $\chi^2 =$   
30  
31 38 44.54,  $df = 28$ ,  $p = 0.0245$ ). Both item fit (mean = 0.30,  $SD = 1.22$ ) and person fit residual values (mean  
32  
33 39 =  $-0.18$ ,  $SD = 0.85$ ) showed perfect fit, as indicated with their  $SD$  values less than the recommended  
34  
35 40 value 1.4. Reliability was very good as indicated by a person separation index ( $PSI = 0.85$  and  
36  
37 41 Cronbach's Alpha (CA) = 0.89. All individual items were ordered thresholds, and showed perfect fit.  
38  
39 42 The K7 showed adequate internal consistency, reliability, unidimensionality and free from local  
40  
41 43 dependency. The K7 also showed similar functioning for different age, sex, educational attainment and  
42  
43 44 socio-economic conditions.  
44  
45  
46  
47

48 45  
49  
50 46 **Conclusions:** Further validation of K7 in different population confirmed that the tool is psychometrically  
51  
52 47 robust and suitable for routine measure of psychological distress and thus provides an effective screening  
53  
54 48 instrument among the rural Bangladeshi population. Research should seek to continually apply the K7 in  
55  
56  
57

1  
2 49 different clinical settings in Bangladesh to determine a valid cutoff score for assessment of the severity  
3  
4 50 of psychological distress. The K7 tool can be tested in other developing countries where socio-  
5  
6 51 demographic characteristics are similar to those in Bangladesh.  
7  
8

9 52  
10  
11 53 **Keywords:** Kessler psychological distress scale, Rasch analysis, Validation, Rural Bangladesh  
12

### 13 54 **Strengths and limitations of this study**

- 15 55 ➤ This study provides the first reliable data on the Kessler K7 questionnaire from a general  
16 56 population of a typical rural district in Bangladesh.
- 17  
18 57 ➤ This study used primary data on K7 and associated covariates.
- 19  
20 58 ➤ The data were collected through face-to-face interviews of people from a typical rural district that  
21  
22 59 represents Bangladesh using mobile data collection tool CommCare.  
23  
24  
25 60 ➤ The sophisticated Rasch analysis technique was applied to validate the K7. The study provides a  
26  
27 61 unique opportunity to assess psychological distress in a rural population of Bangladesh.  
28  
29  
30 62 ➤ The potential drawback of this study is that it is based on a single-occasion collection of data  
31  
32 63 from a rural district in Bangladesh. While we have attempted to check the situation of our  
33  
34 64 previously validated model whether the K7 perfectly match all the assumption of Rasch  
35  
36 65 properties. Moreover, the study needs to be repeated in a random sample of the clinical setting in  
37  
38  
39 66 different rural districts to be truly representative of the national population.  
40  
41  
42  
43  
44  
45  
46  
47  
48  
49  
50  
51  
52  
53  
54  
55  
56  
57

## 73 **Background**

74 Globally, one out of four individuals is influenced by mental or psychological distress at some point in  
75 their lives [1]. Almost 66% of the individuals with psychological distress never look for assistance  
76 because they were unaware of, or neglect their disorder [2]. Due to a rapid growth of psychiatric  
77 disorders, there is a need to identify the conditions quickly and in a cost-effective manner [3]. Early  
78 diagnosis of psychological distress has been seen as an essential measure to guarantee successful and  
79 focused onto ensure effective and targeted intervention among patients with psychological distress [4].  
80 In recent years, the researchers are interested for early diagnosis of psychological distress using tools  
81 with less number of items for measuring psychological distress among the general population [5].  
82 Therefore, the development and continued validation of the tools used for measuring psychological  
83 distress are critical, especially for early detection of psychological instability.

84  
85 Over the last three decades, various tools have been used to measure psychological distress [6-8].  
86 However, their extensive list of items was limited to the use of a powerful tool targeted at the general  
87 population. The Kessler 10-item questionnaire (K10) is an exception that was developed by Professors'  
88 Kessler and Mroczek in 1992, to be utilised in the United States National Health Interview Survey as a  
89 brief measure of non-explicit psychological distress along the anxiety-depression spectrum [9]. The K10  
90 includes ten items (evaluated on five-point Likert-type scales, where 1 = none of the time to 5 = all of  
91 the time) dedicated to measuring psychological distress. Kessler 10 items questionnaire is not a  
92 diagnostic tool, but it measures severity levels associated with psychological distress and thus has been  
93 utilised to recognise individuals needing a further appraisal for anxiety and depression. The K10 tool was  
94 initially developed to recognise the levels of non-specific psychological distress in the general population  
95 and was employed in many countries including the Australia, Canada and USA [10-13]. The World  
96 Health Organization's World Mental Health Survey also used this tool [14]. The tool has also exhibited

1  
2 97 a substantial association with severe mental illnesses [15]. As such, clinicians recommend utilisation of  
3  
4 98 the K10 to screen for psychiatric illness [16, 17]. Although K10 is quick and a cost-effective tool to  
5  
6 99 screen psychological distress among general people [9], its cross-cultural validity was not employed in  
7  
8  
9 100 any rural settings including among rural population in Bangladesh.  
10

11 101  
12  
13 102 Bangladesh is a densely populated country with a population of 167 million people [18]; around 65% of  
14  
15  
16 103 them live in rural area [19]. Psychological distress has been found to be a significant public health  
17  
18 104 concern especially in these areas [20-22]. The prevalence of mental disorders in such areas varies notably,  
19  
20 105 ranging from 6.5% to 31% of the total population, conceivably due to the utilisation of diverse  
21  
22 106 conventions, measuring tools and various meanings associated with mental disorders [23]. Further, there  
23  
24  
25 107 has been no culturally sensitive tool available for rapid screening of psychological distress in Bangladesh.  
26  
27 108 Recently, Uddin et al. [24] validated the K10 scale using Rasch analysis technique in a rural area of  
28  
29  
30 109 Bangladesh and proposed a modified version with seven items (K7) that proved to be robust with four-  
31  
32 110 point liker type scale instead of the five-point scale of the original K10. The modified K7 version  
33  
34 111 followed all assumptions of Rasch analysis and produced a unidimensional tool for measuring  
35  
36 112 psychological distress.  
37  
38

39 113  
40  
41 114 The validated K7 scale offers a progressively useful screening tool for measuring and identifying  
42  
43 115 psychological distress among the rural population of Bangladesh. This K7 model provides additional  
44  
45  
46 116 benefits as it can be applied in clinical settings to measure psychological distress through a shortened  
47  
48 117 version of the Kessler 10 items questionnaire. The culturally validated instrument of the K7 scale can  
49  
50 118 provide an increasingly productive resource for health care services and can apply in other developing  
51  
52  
53 119 countries with similar socio-demographic characteristics. However, for application in clinical settings,  
54  
55  
56  
57



1  
2 120 further validation of the K7 scale with its four-response categories, as applied in different populations is  
3  
4 121 required.

5  
6 122  
7  
8  
9 123 Therefore, the current study aims to provide additional validation of the modified version of the K7 scale  
10  
11 124 for potential application within clinical settings in diverse populations.

## 12 125 13 14 15 16 126 **Materials and Methods**

### 17 18 127 **Study Population**

19  
20 128 Bangladesh is a nation of 167 million individuals parted into 64 districts [18]. Adult Participants aged 18  
21  
22  
23 129 to 90 years were selected from the Narail Upazilla, which is found around 200 km south-west of Dhaka,  
24  
25 130 the capital city of Bangladesh, between August and September of 2018. The study area that includes a  
26  
27  
28 131 geographic area and 300 survey points of data collection gathered from the three unions (Auria,  
29  
30 132 Banshgram and Bhardabila), has been described in detail in Fig. 1.

### 31 32 133 33 34 134 **Sample Size and Statistical Power**

35  
36  
37 135 Three hundred sample is appropriate for a Rasch examination since large sample sizes can result in type  
38  
39 136 1 errors that falsely dismiss an item for not fitting in the Rasch model [25]. A sample size of 300 is  
40  
41 137 viewed as sufficiently substantial to ensure 99% confidence that the item difficulty would be within  $\pm 1/2$   
42  
43  
44 138 logit of its stable value [26].

### 45 46 139 47 48 140 **Sampling Frame**

49  
50 141 Data were collected from three unions (smallest rural administrative unit) out of nine unions, excluding  
51  
52  
53 142 the four which were selected previously from the 13 unions of Narail Upazilla [27]. The selected unions  
54  
55 143 are Auria, Banshgram and Bhardabila. One village (a smallest territorial and social unit for  
56  
57

1  
2 144 administrative and representative purposes), from each of the chosen unions, were randomly selected at  
3  
4 145 the second level. The selected villages are Baliadanga, Fulshor and Rogunathpur. Two paras (further  
5  
6 146 divisions of the village) from each selected village were randomly chosen at the third level. In total, 40  
7  
8  
9 147 adults (18–59 years old) and 40 older adults (60–90 years old) from each of the villages/wards were  
10  
11 148 interviewed. Three hundred and twenty participants were interviewed for data collection. To maintain  
12  
13 149 unbiasedness, we have used 300 with an equal proportion of adults and older adults, further divided into  
14  
15  
16 150 a similar proportion of gender.

### 18 151 **Data collection using CommCare and its advantage over using printed questionnaire**

20 152 Mobile data collection is a method employed to collect any qualitative and quantitative inputs via a  
21  
22 153 mobile device (e.g. mobile phone, tablet, etc.). The introduction of mobile devices has mitigated tedious  
23  
24  
25 154 process, making it more fun and efficient [28]. The most noteworthy are the difficulties of paper based  
26  
27 155 data collection are mentioned as follows safeguarding against human mistakes, slow reporting and delays  
28  
29 156 in data entry, a lack of flexibility in deploying programmatic changes, poor location information and  
30  
31  
32 157 disturbances to recipient connections [29]. With the proper implementation of the mobile data collection  
33  
34 158 tool, these issues can be solved [30]. CommCare ([www.commcarehq.org](http://www.commcarehq.org)) is a customisable, mobile  
35  
36 159 platform, which empowers non-developers to build mobile applications for data collection [31].  
37  
38  
39 160 CommCare allows the mobile applications to run offline and gathered information can be transmitted to  
40  
41 161 CommCareHQ when internet connectivity becomes accessible [32].  
42

43 162  
44  
45 163 The current study followed a strict protocol to ensure a smooth launch when the application was finalised  
46  
47  
48 164 and was thoroughly tested before training began [33]. We pilot tested the software with 30 people and  
49  
50 165 found some minor problems as some respondents did not understand the application correctly. We  
51  
52 166 addressed these concerns and then upgraded the version before distributing it for final data collection.  
53  
54  
55 167

### **Modified Kessler Psychological Distress Scale (K7)**

The K10 measures, how regularly members have encountered manifestations of anxiety and depressive disorders in the past four weeks before screening [9]. However, Uddin et al. [24] validated K10 using Rasch analysis in rural Bangladesh and found that seven-item (K7) was more suitable to use in rural Bangladesh rather than ten items (K10) [24]. For use in clinical settings, further validation is required. In that context, additional data has been collected from different location using K7 to ensure the integrity of the findings prior to use in a clinical setting in rural Bangladesh. Respondents were asked, ‘During the past four weeks, how often did you feel: 1) nervous; 2) so nervous that nothing could calm you down; 3) hopeless; 4) restless or fidgety; 5) so restless you could not sit still; 6) so depressed that nothing could cheer you up; 7) everything was an effort;’ Items are rated on a four-point liker type scale: all of the time (score 4), most or some of the time (score 3), a little of the time (score 2) and none of the time (score 1).

### **Outcome measure and differential item functioning (DIF)**

The primary outcome measure was the validity of the K7 scale using Rasch analysis. Demographic details were collected for age, gender and level of education and socio-economic conditions. Age, sorted as either adult (18 to 59 years) or older adult (60 to 90 years), sex (male or female), education (no education or at least primary) and socio-economic conditions (low (insufficient funds most/some of the time) and high (balance/sufficient funds all the time)) which were used as DIF factors.

### **The Rasch Model**

The Rasch model was named after Danish mathematician Georg Rasch [34]. The model shows what is required in reactions to items if estimation (at the measurement level) is to be accomplished most accurately. Two versions of the Rasch model are available: dichotomous [34] and polytomous [35]. The polytomous Rasch model was utilised in this investigation.

1  
2 192  
3  
4 193 The Rasch analysis utilised in this investigation was conducted using the software package RUMM 2030  
5  
6 194 [36]. The Rasch model makes a few hypotheses that should be assessed to guarantee an instrument has  
7  
8  
9 195 Rasch properties. The most ordinarily evaluated Rasch suspicions are a) unidimensionality, b) local  
10  
11 196 independence and c) invariability. As indicated by the Rasch demonstrate, the overall fit of the model is  
12  
13 197 defined by Chi-square item-trait interaction statistics [37]. A non-significant chi-square *p*-value is  
14  
15  
16 198 required. A Bonferroni adjustment of significance value [38] is typically used to assess statistical  
17  
18 199 significance. Item-person interaction statistics are exhibited as z-statistics (mean = 0 and standard  
19  
20 200 deviation (SD) =1), showing ideal fit. Individual item fit (IFR) measurements incorporate the residuals  
21  
22  
23 201 satisfactorily when inside the range  $\pm 2.5$  and a non-significant chi-square value [39].  
24

25 202  
26  
27 203 A "threshold" parameter is characterized by two response options where either response is similarly  
28  
29 204 likely. Disordered thresholds demonstrate that the respondents are not ready to segregate between the  
30  
31  
32 205 responses choices. Disordered thresholds result in item misfit and can be redressed by combining two  
33  
34 206 neighbouring response options [40]. Unidimensionality suggests that the scale estimates just a single  
35  
36 207 build [41]. For a scale to be unidimensional, under 5% of the t-tests ought to be significant, or the  
37  
38  
39 208 binomial distributions confidence interval's lower bound should overlap 5% [42]. The person-item  
40  
41 209 residuals correlation matrix used to determine whether there is any local dependency between the items,  
42  
43 210 and it is generally agreed that 0.3 is a more suitable value [43]. Differential item functioning (DIF)  
44  
45  
46 211 happens when two groups with a similar dimension of the developed estimate react differently [44, 45].  
47  
48 212 Rasch examination gives a marker of reliability. In RUMM 2030, this is given by the Person Separating  
49  
50 213 Index (PSI) [46]. The PSI is comparable to Cronbach's alpha (CA); a value near 1 shows high internal  
51  
52  
53 214 consistency and a value under 0.7 demonstrates model misfit [47].  
54

## 217 Patient and public involvement

218 Our study participants are the general people with or without any particular disease. There was a public  
 219 involvement in conducting the research including informing the district commissioner, district police  
 220 super, civil surgeon, and the public representatives such as the Chairman of the union parishad. We  
 221 conducted a pilot survey and arranged a focus group discussion regarding the understanding of the  
 222 questionnaire by the general people. To maintain an approximately equal number of male and female  
 223 participants, one female was interviewed immediately after a male participant. Participants did not  
 224 involve in the recruitment to and conduct of the study. Although the results are being published in peer-  
 225 reviewed journals, the results will be disseminated via community briefs and presentations at national  
 226 and international conferences.

## 228 Results

229 Table 1 describes the socio-demographic characteristics of the participants by gender (male vs female).  
 230 The mean (standard deviation (SD), range) age of the participants was 52.0 years (15.6, 18-90). A  
 231 considerably large proportion (45.0%) of the populations did not have any formal education, with only  
 232 1.3% attaining a bachelor's degree or above. The socio-economic condition for most respondents (about  
 233 41.3%) was occasional financial instability, 32.3% experienced a precarious financial situation, 25.3%  
 234 experienced balance and 1.0% held sufficient funds most of the time. Overall 23.7% of participants were  
 235 engaged in business, farming and students activities; none of these respondents was female. Most of the  
 236 participants were married (81.3%) and 36.8% participants were current smokers.

237 **Table 1** Sociodemographic characteristic of Gender in Narail Upazilla in Bangladesh

| Characteristic | Total (300) | Female (150) | Male (150)  |
|----------------|-------------|--------------|-------------|
|                | Mean (SD)   | Mean (SD)    | Mean (SD)   |
| Age (in years) | 52 (15.7)   | 51.7 (15.5)  | 52.8 (16.0) |
| Age In group   | Number (%)  | Number (%)   | Number (%)  |
| Adult          | 150 (50.0)  | 75 (50.0)    | 75 (50.0)   |
| Elderly        | 150 (50.0)  | 75 (50.0)    | 75 (50.0)   |

|                                                          |            |            |            |
|----------------------------------------------------------|------------|------------|------------|
| <b>Level of education (in years)</b>                     |            |            |            |
| No education                                             | 135 (45.0) | 80 (53.3)  | 55 (36.7)  |
| Primary (1-5)                                            | 80 (26.7)  | 36 (24)    | 44 (29.3)  |
| Secondary (6-9)                                          | 64 (21.3)  | 31 (20.7)  | 33 (22)    |
| SSC or HSC Pass (10-12)                                  | 17 (5.7)   | 3 (2.0)    | 14 (9.3)   |
| Degree or equivalent (13 -16)                            | 4 (1.3)    | 0          | 4 (2.7)    |
| <b>Socio-economic condition:</b>                         |            |            |            |
| Insufficient funds most of the time                      | 97 (32.3)  | 62 (41.3)  | 35 (23.3)  |
| Insufficient funds some of the time                      | 124 (41.3) | 50 (33.3)  | 74 (49.3)  |
| Balance                                                  | 76 (25.3)  | 37 (24.7)  | 39 (26)    |
| Sufficient funds most of the time                        | 3 (1.0)    | 1 (0.7)    | 2 (1.3)    |
| <b>Occupation</b>                                        |            |            |            |
| Student                                                  | 5 (1.7)    | 0          | 5 (3.3)    |
| Farmers in your own land                                 | 42 (14.0)  | 0          | 42 (28)    |
| Business                                                 | 24 (8.0)   | 0          | 24 (16)    |
| Govt/Private Job                                         | 3 (1.0)    | 1 (0.7)    | 2 (1.3)    |
| Daily Labour                                             | 44 (14.7)  | 0          | 44 (29.3)  |
| Housewives                                               | 122 (40.7) | 122 (81.3) | 0 (0)      |
| Unemployed                                               | 1 (0.3)    | 0          | 1 (0.7)    |
| Retired                                                  | 31 (10.3)  | 19 (12.7)  | 12 (8)     |
| Cannot work due to disability                            | 28 (9.3)   | 8 (5.3)    | 20 (13.3)  |
| <b>Marital status</b>                                    |            |            |            |
| Married                                                  | 244 (81.3) | 107 (71.3) | 137 (91.3) |
| Widow                                                    | 46 (15.3)  | 41 (27.3)  | 5 (3.3)    |
| Unmarried/never married                                  | 9 (3.0)    | 1 (0.7)    | 8 (5.3)    |
| Divorced/separated                                       | 1 (0.3)    | 1 (0.7)    | 0          |
| <b>Smoking Status</b>                                    |            |            |            |
| Never smoker                                             | 115 (38.5) | 66 (44.3)  | 49 (32.7)  |
| Past smoker                                              | 2 (0.7)    | 0          | 2 (1.3)    |
| Current smoker                                           | 39 (13.0)  | 1 (0.7)    | 38 (25.3)  |
| Do not smoke but consume gul etc                         | 110 (36.8) | 78 (52.3)  | 32 (21.3)  |
| Current smoking consumes gul and eating tobacco etc      | 32 (10.7)  | 4 (2.7)    | 28 (18.7)  |
| Smoke and consume other addicted items, gaja, wine, etc. | 80 (26.7)  | 36 (24)    | 44 (29.3)  |

Further validation of K7 scale showed good overall fit to the Rasch model ( $\chi^2 = 44.54$  df = 28,  $p = 0.0245$ ). The items fit residual (IFR) (M = 0.30, SD = 1.22) and the person fit residuals (PFR) (M = -0.18, SD = 0.85) were within the acceptable range (Table 2). All seven items were found to have ordered thresholds (Fig. 2), suggesting no problems with the 4-point liker-type scale used in the modified questionnaire.

**Table 2** Overall model fit statistics for the further validation of the K7 scale

| Model fit statistics                               | Total sample N=300  |
|----------------------------------------------------|---------------------|
| Overall model fit, Chi-square value                | 44.54               |
| Degree of freedom (DF)                             | 28                  |
| P                                                  | 0.0245              |
| Item fit residuals (mean (SD))                     | 0.30 (1.22)         |
| Person fit residuals (mean (SD))                   | -0.18 (0.85)        |
| Person separation index (PSI)                      | 0.85                |
| Coefficient alpha                                  | 0.89                |
| Unidimensionality test (% that goes beyond 95% CI) | 3.7% CI (1.2 - 6.1) |

No misfit or overfit items were identified with significant chi-square probability values. There was neither high positive nor high negative residual values ( $\pm 2.5$ ) observed. All seven individuals' item fit statistics showed a good fit (Table 3). The value of the PSI (0.85) is analogous to Cronbach's alpha (0.89) for the original set of seven items with four response categories indicating that the scale worked well to separate persons. A visual examination of the threshold map (Fig. 2) showed that the estimates of the thresholds defined the categories in all seven items form distinctive regions of the continuum. We also examined the category probability curve of each item and found all adjacent categories were the same (Fig. 3).

**Table 3** Individuals' item fit statistics of further validation of the K7 scale

| Items                        | Individuals' items fit statistics of K7 scale |       |          |          |         |
|------------------------------|-----------------------------------------------|-------|----------|----------|---------|
|                              | Location                                      | SE    | Residual | $\chi^2$ | P value |
| Feel nervous (2)             | -0.944                                        | 0.124 | -0.224   | 8.78     | 0.067   |
| Feel so nervous (3)          | 0.139                                         | 0.123 | -0.177   | 5.91     | 0.206   |
| Feel hopeless (4)            | 0.049                                         | 0.112 | 1.215    | 1.23     | 0.874   |
| Feel restless or fidgety (5) | -0.843                                        | 0.110 | 1.993    | 13.09    | 0.011   |
| Feel so restless (6)         | -0.573                                        | 0.110 | -0.743   | 3.58     | 0.466   |
| Everything was an effort (8) | 1.645                                         | 0.115 | -1.222   | 7.58     | 0.108   |
| Feel so sad (9)              | 0.528                                         | 0.117 | 1.095    | 4.39     | 0.356   |

The K7 scale was assessed for DIF across gender (male/female), age (adults/older adults), education (no education/some education) and socio-economic conditions (low/high) (Table 4). No significant DIF was



found for any of the items. The unidimensionality of the K7 scale was supported by independent t-tests comparing the person estimates with the principal component analysis (PCA) of the residuals; our findings indicated that only 3.7% (95% Confidence Interval: 1.2% to 6.1%) of cases showed statistically significant differences (Table 2 and Figure 4). There were no correlation coefficients above 0.30 on the person-item residual correlation matrix, indicating no local dependency of the items (Table 5).

**Table 4** DIF on age, gender, educational attainment and socio-economic conditions on K7 scale

| Items                        | DIF on Age                    |      |    |       | DIF on Gender                    |      |    |       |
|------------------------------|-------------------------------|------|----|-------|----------------------------------|------|----|-------|
|                              | MS                            | F    | DF | Prob  | MS                               | F    | DF | Prob  |
| Feel nervous (2)             | 1.81                          | 2.25 | 1  | 0.135 | 1.26                             | 1.55 | 1  | 0.215 |
| Feel so nervous (3)          | 1.18                          | 1.46 | 1  | 0.228 | 0.14                             | 0.17 | 1  | 0.682 |
| Feel hopeless (4)            | 0.85                          | 0.87 | 1  | 0.351 | 3.45                             | 3.61 | 1  | 0.059 |
| Feel restless or fidgety (5) | 0.81                          | 0.80 | 1  | 0.373 | 0.93                             | 0.92 | 1  | 0.339 |
| Feel so restless (6)         | 2.20                          | 2.79 | 1  | 0.096 | 0.16                             | 0.20 | 1  | 0.655 |
| Everything was an effort (8) | 0.25                          | 0.34 | 1  | 0.560 | 0.64                             | 0.88 | 1  | 0.351 |
| Feel so sad (9)              | 0.77                          | 0.79 | 1  | 0.374 | 0.06                             | 0.06 | 1  | 0.800 |
| Items                        | DIF on Educational attainment |      |    |       | DIF on Socio-economic Conditions |      |    |       |
|                              | MS                            | F    | DF | Prob  | MS                               | F    | DF | Prob  |
| Feel nervous (2)             | 0.44                          | 0.55 | 1  | 0.458 | 0.00                             | 0.01 | 1  | 0.939 |
| Feel so nervous (3)          | 0.19                          | 0.22 | 1  | 0.637 | 0.34                             | 0.41 | 1  | 0.521 |
| Feel hopeless (4)            | 0.02                          | 0.02 | 1  | 0.897 | 0.84                             | 0.88 | 1  | 0.351 |
| Feel restless or fidgety (5) | 0.29                          | 0.28 | 1  | 0.597 | 2.18                             | 2.15 | 1  | 0.144 |
| Feel so restless (6)         | 0.02                          | 0.02 | 1  | 0.883 | 0.27                             | 0.34 | 1  | 0.559 |
| Everything was an effort (8) | 1.83                          | 2.48 | 1  | 0.117 | 0.48                             | 0.65 | 1  | 0.421 |
| Feel so sad (9)              | 0.01                          | 0.01 | 1  | 0.917 | 0.00                             | 0.00 | 1  | 0.955 |

**Table 5** Residuals correlation matrix of the K7 scale

| Items               | Feel nervous (2) | Feel so nervous (3) | Feel hopeless (4) | Feel restless (5) | Feel so restless (6) | Everything was an effort (8) | Feel so sad (9) |
|---------------------|------------------|---------------------|-------------------|-------------------|----------------------|------------------------------|-----------------|
| Feel nervous (2)    | 1                |                     |                   |                   |                      |                              |                 |
| Feel so nervous (3) | 0.278            | 1                   |                   |                   |                      |                              |                 |
| Feel hopeless (4)   | -0.128           | -0.191              | 1                 |                   |                      |                              |                 |



|    |    |    |    |    |    |    |    |    |    |
|----|----|----|----|----|----|----|----|----|----|
| 1  | 2  | 3  | 4  | 5  | 6  | 7  | 8  | 9  | 10 |
| 11 | 12 | 13 | 14 | 15 | 16 | 17 | 18 | 19 | 20 |
| 21 | 22 | 23 | 24 | 25 | 26 | 27 | 28 | 29 | 30 |
| 31 | 32 | 33 | 34 | 35 | 36 | 37 | 38 | 39 | 40 |
| 41 | 42 | 43 | 44 | 45 | 46 | 47 | 48 | 49 | 50 |
| 51 | 52 | 53 | 54 | 55 | 56 | 57 | 58 | 59 | 60 |

## Discussion

The inspiration behind the paper was to evaluate the appropriateness of the modified K7 scale (which was prior validated from K10) survey for measuring psychological distress in rural Bangladesh for its adaptation in clinical settings. This paper includes Rasch examination to investigate a few issues concerning the K7. The article also incorporates the validity of the category scorings framework, the fit of individual items and an evaluation of the potential predisposition of age-sex distribution, education attainment and socio-economic status.

The K10 scale has recently experienced a thorough psychometric examination in rural Bangladesh and found K7 scale was a valid instrument to measure psychological distress in rural Bangladesh [24]. However, further validation was required to confirm its use in clinical settings. From the Rasch examination point of view, the underlying illustrative examination focused on the present rural samples of Bangladesh. The modified K7 scale with four response classifications showed no redundancy (little impact on the scale) and no misfit. Besides, items were all order thresholds, and scale demonstrated no proof of multi-dimensionality.

It has commonly been assumed that, deduction of items from the scale would reduce at least some redundancy [48-51]. However, our examination recognised that Cronbach's alpha for the K7 scale (0.89) was comparable to the earlier validated K7 Cronbach's alpha (0.88) [16]; besides, the PSI of K7 (0.85)

1  
2 286 was equivalent to the previously validated K7 (0.84) [24]. Previous study demonstrated some redundancy  
3  
4 287 in Cronbach's alpha when contrasting K10 (0.93) and K6 (0.89) [52]. Notwithstanding, the current study  
5  
6 288 demonstrates the prevalent estimation of Cronbach's alpha K7 (0.89) contrasted with the earlier validated  
7  
8  
9 289 K7 (0.88) and K10 (0.87). Therefore, the current study further confirms that the K7 scale is a robust tool  
10  
11 290 compared to the K10 [24] in measuring psychological distress in rural Bangladesh.  
12

13 291  
14  
15  
16 292 It is widely held view that sexual orientation contrasts in psychological research are omnipresent [53,  
17  
18 293 54], so it is fundamental to confirm whether the model is influenced by sex or not. The K7 scale  
19  
20 294 demonstrated no DIF on sex, and is appropriate for any gender, which supports the previous discoveries  
21  
22 295 announced in Australia [54] and Bangladesh [24]. Another essential factor is age, as there was an  
23  
24  
25 296 discrepancy with the association among age and psychological distress [55]. An investigation led by  
26  
27 297 Kessler et al. recorded a conventional arrangement of disparity in the association among age [56].  
28  
29 298 However, different investigations exhibited a stable nonlinear connection between age and psychological  
30  
31  
32 299 distress in a few cross-sectional epidemiologic studies [55, 57, 58]. The evident from this study suggests  
33  
34 300 that there is no age inclination (adults and older adults).  
35

36 301  
37  
38  
39 302 Higher levels of psychological distress are present among individuals with lower educational attainment  
40  
41 303 compared with higher educational attainment [54, 59]. The level of education may influence  
42  
43 304 psychological distress questionnaire responses and may affect the measurement of psychological distress  
44  
45  
46 305 levels. A negative relationship between socioeconomic position and psychological distress has been  
47  
48 306 established in the literature [60], with the low socioeconomic status associated with a higher level of  
49  
50 307 psychological distress [61]. Follow-up on these development methods provides an evaluation mechanism  
51  
52  
53 308 regarding the K7 scale and specifically explores whether it is equally valid across socio-economic  
54  
55  
56  
57

1  
2 309 conditions and is consistent with educational achievement. We have found that the K7 scale is equally  
3  
4 310 applicable to any educational level as well as any socio-economic status.  
5

6 311  
7  
8  
9 312 Use of the Rasch estimation demonstrated in this study has strengthened the viability of the K7 scale for  
10  
11 313 measuring psychological distress in rural Bangladesh. The scale demonstrates a high reliability, ordered  
12  
13 314 thresholds and no proof of DIF. The scale additionally demonstrated high PSI (0.85) and reliability  
14  
15  
16 315 (0.89), which showed the power of the test of fit. This study provides significant evidence that a complete  
17  
18 316 score of psychological distress can be measured, to accelerate finding a legitimate cut-off score for rural  
19  
20 317 people in Bangladesh. Building up a cut-off score can help with evaluating the level of the severity of  
21  
22  
23 318 psychological distress.  
24

25 319  
26  
27 320 This paper demonstrates how the Rasch model can be used for intensive examination and improvement  
28  
29  
30 321 of estimation instruments. The Rasch model display disentangles estimation issues, for example, lack of  
31  
32 322 invariance (invariance is a property of the model parameters, which “only holds when the fit of the model  
33  
34 323 to the data is precise in the population”[62]. However, in real-life applications lack of invariance will  
35  
36 324 always be found due to the probabilistic nature of the IRT models), which was disregarded in  
37  
38  
39 325 conventional analysis [63]. Lessening the number of response categories as well as the number of items  
40  
41 326 may likewise improve the properties of the scale [24, 64]. It can, therefore, be argued persuasively that  
42  
43 327 the information on the general rural population in regard to psychological distress dependent on the re-  
44  
45  
46 328 examined seven-item scale from the K10, with four-response category, is better than the original scale.  
47

48 329  
49  
50 330 The Rasch examination contributes valuable information on dimensions of psychological distress among  
51  
52  
53 331 the general rural population of Bangladesh. The investigation based on a data set with a wide age  
54  
55 332 distribution, from whom data were collected directly through a face-to-face interview. Mobile data  
56

1  
2 333 collection platform CommCare ([www.commcarehq.org](http://www.commcarehq.org)) [33] was used for data collection. This enhanced  
3  
4 334 data collection method may assist clinicians by offering a new clinical and research utility. Further, the  
5  
6 335 K7 scale applied by this strategy may work as a productive screener for psychological distress in various  
7  
8  
9 336 medicinal services settings, including primary and integrated care facilities. This can caution clinicians  
10  
11 337 to patients who may benefit from a progressively exhaustive psychological assessment or a possible  
12  
13 338 referral for psychiatric care. The K7 scale may likewise assume a job in distinguishing psychological  
14  
15  
16 339 distress earlier and make it more probable that patients receive appropriate care in health services settings.  
17  
18 340 Moreover, the K7 scale can be made openly accessible in any health care setting as well as on the web.  
19  
20 341 Given its smallness and straightforwardness in both on the web and paper format, K7 scale might be  
21  
22  
23 342 supported to individuals searching for a self-detailed assessment measure.  
24

25 343  
26  
27 344 The potential limitation of this investigation is that it depends on single-occasion data from people in a  
28  
29  
30 345 rural region of Bangladesh. While we have attempted further approve the K7 scale in the rural area of  
31  
32 346 Narail for use in a clinical setting, the investigation would be improved if a national delegate sample  
33  
34 347 were available.  
35

## 36 348 37 38 39 349 **Conclusion**

40  
41 350 In conclusion, the study recommended the utilisation of K7 scale in rural Bangladesh. The research  
42  
43 351 gleaned from this study finding suggests that a seven-item scale taken from the K10, with four-response  
44  
45  
46 352 categories, would give a robust psychometric scale. The K7 scale satisfies all the assumptions of the  
47  
48 353 Rasch model. The model has appeared to contain no DIF on age, sex distribution, educational attainment  
49  
50 354 and different socio-economic conditions. The K7 scale has no local dependency, and the scale is  
51  
52  
53 355 unidimensional. Further examination of K7 scale affirmed that the tool could also be utilised in medical  
54  
55 356 settings to offer huge advantages as a standard measure of psychological screening instrument for  
56  
57

1  
2 357 evaluating psychological distress among the rural Bangladeshi population. Besides, the tool can be  
3  
4 358 applied in other developing nations where the similar socio-demographic attributes exist. In addition, the  
5  
6 359 tool can be connected within clinical settings to provide a national dimension with telemedicine, where  
7  
8  
9 360 mental health conditions cannot be analysed.  
10

11 361

## 12 13 362 **Abbreviations**

14  
15  
16 363 CA: Cronbach's Alpha, DIF: Differential Item Functioning, IFR: Item Fit Residuals, IRT: Item Response  
17  
18 364 Theory, K7: Modified Seven Item Scale of Kessler Psychological Distress Scale, K10: Kessler  
19  
20 365 Psychological Distress Scale, PCA: Principal Component Analysis PFR: Person Fit Residuals; PSI:  
21  
22 366 Person Separation Index, SD: Standard Deviation  
23  
24

25 367

## 26 27 368 **Declarations**

## 28 29 369 **Acknowledgements**

30  
31  
32 370 We especially recognize the commitment of Md Mofijul Islam, Serajul Islam and Arzan Hosen for their  
33  
34 371 diligent work in door-to-door data collection. We additionally recognize DR Mostofa Sarwar to assist us  
35  
36 372 with building the mobile data collection platform using CommCare for data collection. Finally, we might  
37  
38  
39 373 want to offer our thanks to the investigation members for their wilful interest.  
40

41 374

## 42 43 375 **Funding**

44  
45  
46 376 The author (Mohammed Nazim Uddin) used his own 'HRD Student Fund' from the Swinburne  
47  
48 377 University of AUD 600 for data collection for this research project. The funder had no role in the plan  
49  
50 378 of the investigation, information accumulation or examination, interpretation of data or writing of the  
51  
52 379 manuscript.  
53  
54

55 380

1  
2 381 ***Availability of data and materials***  
3

4 382 The datasets used and/or analysed during the current study are available from the corresponding author  
5  
6 383 on reasonable request.  
7  
8

9 384  
10  
11 385 ***Author Contributions***  
12

13 386 MNU and FMAI jointly structured the examination. MNU analysed the data and drafted the manuscript.  
14  
15  
16 387 FMAI supervised and reviewed the manuscript. All authors contributed to the development of the  
17  
18 388 manuscript, read, and endorsed its final version.  
19

20 389  
21  
22  
23 390 ***Ethics approval and consent to participate***  
24

25 391 All procedures performed in studies involving human participants were in accordance with the ethical  
26  
27 392 standards of the institutional and/or national research committee and with the 1964 Helsinki declaration  
28  
29  
30 393 and its later amendments or comparable ethical standards. The ethics committee of the Swinburne  
31  
32 394 University of Technology Human Ethics Committee (SHR Project 2015/065 extended endorsement got  
33  
34 395 in July 2018) has granted ethical approvals. Written informed consent was acquired from every individual  
35  
36 396 member incorporated into the study.  
37  
38

39 397  
40  
41 398 ***Consent for publication***  
42

43 399 None applicable  
44  
45  
46 400  
47

48 401 ***Competing interests:***  
49

50 402 The authors declare that they have no competing interest  
51  
52  
53 403  
54

55 404 **References**  
56  
57 405

- 1  
2 406 1. Organization, W.H., *The world health report: 2001. Mental health: new understanding, new*  
3 407 *hope*. Geneva: WHO; 2001. 2001: p. 1-5.
- 4 408 2. Svenaeus, F., *Diagnostic and statistical manual of mental disorders, 5th edition*. Medicine  
5 409 Health Care and Philosophy, 2014. **17**(2): p. 241-244.
- 6 410 3. Fard, K., R.W. Hudgens, and A. Weiner, *Undiagnosed Psychiatric Illness in Adolescents: A*  
7 411 *Prospective Study and Seven-Year Follow-up*. Archives of General Psychiatry, 1978. **35**(3): p.  
8 412 279-282.
- 9 413 4. Costello, E.J., *Early Detection and Prevention of Mental Health Problems: Developmental*  
10 414 *Epidemiology and Systems of Support*. Journal of Clinical Child and Adolescent Psychology,  
11 415 2016. **45**(6): p. 710-717.
- 12 416 5. Sunderland, M., A. Mahoney, and G. Andrews, *Investigating the Factor Structure of the*  
13 417 *Kessler Psychological Distress Scale in Community and Clinical Samples of the Australian*  
14 418 *Population*. Journal of Psychopathology and Behavioral Assessment, 2012. **34**(2): p. 253-259.
- 15 419 6. Beck, A.T., et al., *An Inventory for Measuring Depression*. Archives of General Psychiatry,  
16 420 1961. **4**(6): p. 561-65.
- 17 421 7. Zigmond, A.S. and R.P. Snaith, *The Hospital Anxiety and Depression Scale*. Acta Psychiatrica  
18 422 Scandinavica, 1983. **67**(6): p. 361-370.
- 19 423 8. Parkitny, L. and J. McAuley, *The Depression Anxiety Stress Scale (DASS)*. Journal of  
20 424 Physiotherapy, 2010. **56**(3): p. 204-204.
- 21 425 9. Kessler, R.C., et al., *Screening for serious mental illness in the general population*. Archives of  
22 426 General Psychiatry, 2003. **60**(2): p. 184-189.
- 23 427 10. Kessler, R.C., et al., *Short screening scales to monitor population prevalences and trends in*  
24 428 *non-specific psychological distress*. Psychological Medicine, 2002. **32**(6): p. 959-976.
- 25 429 11. Andrews, G. and L. Peters, *The psychometric properties of the composite international*  
26 430 *diagnostic interview*. Social Psychiatry and Psychiatric Epidemiology, 1998. **33**(2): p. 80-88.
- 27 431 12. Kessler, R. and D. Mroczek, *Final versions of our non-specific psychological distress scale*.  
28 432 Memo dated March, 1994. **10**: p. 1994.
- 29 433 13. Slade, T., et al., *2007 National Survey of Mental Health and Wellbeing: methods and key*  
30 434 *findings*. Australian and New Zealand Journal of Psychiatry, 2009. **43**(7): p. 594-605.
- 31 435 14. Kessler, R.C. and T.B. Ustun, *The World Mental Health (WMH) Survey Initiative version of the*  
32 436 *World Health Organization (WHO) Composite International Diagnostic Interview (CIDI)*.  
33 437 International Journal of Methods in Psychiatric Research, 2004. **13**(2): p. 93-121.
- 34 438 15. Andrews, G. and T. Slade, *Interpreting scores on the Kessler Psychological Distress Scale*  
35 439 *(K10)*. Australian and New Zealand Journal of Public Health, 2001. **25**(6): p. 494-497.
- 36 440 16. Furukawa, T.A., et al., *The performance of the K6 and K10 screening scales for psychological*  
37 441 *distress in the Australian National Survey of Mental Health and Well-Being*. Psychological  
38 442 Medicine, 2003. **33**(2): p. 357-362.
- 39 443 17. Kessler, R.C., et al., *Screening for serious mental illness in the general population with the K6*  
40 444 *screening scale: results from the WHO World Mental Health (WMH) survey initiative*.  
41 445 International Journal of Methods in Psychiatric Research, 2010. **19**: p. 4-22.
- 42 446 18. Bank, W. *Bangladesh Current Population*. 2016 [cited 2017 16/8/2017]; Available from:  
43 447 <https://data.worldbank.org/indicator/SP.POP.TOTL?locations=BD>.
- 44 448 19. Bank, W., *World development indicators 2016 (English)*. World Development Indicators.  
45 449 Washington, D.C. : World Bank Group. 2016.
- 46 450 20. Hosain, G.M.M., et al., *Prevalence, pattern and determinants of mental disorders in rural*  
47 451 *Bangladesh*. Public Health, 2007. **121**(1): p. 18-24.
- 48 452 21. Islam, M.M., et al., *Prevalence of psychiatric disorders in an urban community in Bangladesh*.  
49 453 General Hospital Psychiatry, 2003. **25**(5): p. 353-357.

57

59

60



- 1  
2 454 22. Moussavi, S., et al., *Depression, chronic diseases, and decrements in health: results from the*  
3 455 *World Health Surveys*. *Lancet*, 2007. **370**(9590): p. 851-858.
- 4 456 23. Hossain, M.D., et al., *Mental disorders in Bangladesh: a systematic review*. *Bmc Psychiatry*,  
5 457 2014. **14**: p. 1-8.
- 6 458 24. Uddin, M.N., F.M.A. Islam, and A. Al Mahmud, *Psychometric evaluation of an interview-*  
7 459 *administered version of the Kessler 10-item questionnaire (K10) for measuring psychological*  
8 460 *distress in rural Bangladesh*. *BMJ Open*, 2018. **8**(6): p. 1-11.
- 9 461 25. Smith, A.B., et al., *Rasch fit statistics and sample size considerations for polytomous data*. *Bmc*  
10 462 *Medical Research Methodology*, 2008. **8**: p. 1-11.
- 11 463 26. Linacre, J.M. *Sample Size and Item Calibration Stability*, 7, p. 328. 1994 [cited 2018  
12 464 24/01/2018]; Available from: [www.rasch.org/rmt/rmt74m.htm](http://www.rasch.org/rmt/rmt74m.htm).
- 13 465 27. Uddin, M.N., et al., *Psychological distress and quality of life: rationale and protocol of a*  
14 466 *prospective cohort study in a rural district in Bangladesh*. *Bmj Open*, 2017. **7**(9): p. 1-10.
- 15 467 28. Lindhiem, O., et al., *Mobile technology boosts the effectiveness of psychotherapy and*  
16 468 *behavioral interventions: a meta-analysis*. *Behavior modification*, 2015. **39**(6): p. 785-804.
- 17 469 29. Goodspeed, R., et al., *Comparing the Data Quality of Global Positioning System Devices and*  
18 470 *Mobile Phones for Assessing Relationships Between Place, Mobility, and Health: Field Study*.  
19 471 *Jmir Mhealth and Uhealth*, 2018. **6**(8).
- 20 472 30. Deussom, R.H., M. Mitchell, and J.D. Ruben, *Using Mobile Technology to Address the 'Three*  
21 473 *Delays' to Reduce Maternal Mortality in Zanzibar*, in *E-Health and Telemedicine: Concepts,*  
22 474 *Methodologies, Tools, and Applications*. 2016, IGI Global. p. 1140-1154.
- 23 475 31. Svoronos, T., et al., *CommCare: Automated quality improvement to strengthen community-*  
24 476 *based health*. Weston: D-Tree International, 2010.
- 25 477 32. Bogan, M., et al. *Improving standards of care with mobile applications in Tanzania*. in *W3C*  
26 478 *Workshop on the Role of Mobile Technologies in Fostering Social and Economic Development*  
27 479 *in Africa*. 2009.
- 28 480 33. DIMAGI. *CommCare*. 2018 [cited 2018 25/05/2018]; Available from:  
29 481 <https://www.dimagi.com/commcare/>.
- 30 482 34. Rasch, G., *An Item Analysis Which Takes Individual Differences into Account*. *British Journal*  
31 483 *of Mathematical & Statistical Psychology*, 1966. **19**: p. 49-57.
- 32 484 35. Andrich, D., *Rating Formulation for Ordered Response Categories*. *Psychometrika*, 1978.  
33 485 **43**(4): p. 561-573.
- 34 486 36. RUMM2030, *RUMM2030 For analysing assessment and attitude questionnaire data*. 2017.
- 35 487 37. Engelhard, G., *Rasch Models for Measurement - Andrich, D.* *Applied Psychological*  
36 488 *Measurement*, 1988. **12**(4): p. 435-436.
- 37 489 38. Leon, A.C., *Multiplicity-adjusted sample size requirements: A strategy to maintain statistical*  
38 490 *power with Bonferroni adjustments*. *Journal of Clinical Psychiatry*, 2004. **65**(11): p. 1511-1514.
- 39 491 39. Bond, T.G. and C.M. Fox, *Applying the Rasch model : fundamental measurement in the human*  
40 492 *sciences*. 2nd ed. 2007, Mahwah, N.J.: Lawrence Erlbaum Associates Publishers. 340 p.
- 41 493 40. Linacre, J.M., *Optimizing rating scale category effectiveness*. *J Appl Meas*, 2002. **3**(1): p. 85-  
42 494 106.
- 43 495 41. Gerbing, D.W. and J.C. Anderson, *An Updated Paradigm for Scale Development Incorporating*  
44 496 *Unidimensionality and Its Assessment*. *Journal of Marketing Research*, 1988. **25**(2): p. 186-192.
- 45 497 42. Brentani, E. and S. Golia, *Unidimensionality in the Rasch model: how to detect and interpret*.  
46 498 *Statistical and Methodological Myths and Urban Legends*, 2007. **67**(3): p. 1-9.
- 47 499 43. Pallant, J.F. and A. Tennant, *An introduction to the Rasch measurement model: An example*  
48 500 *using the Hospital Anxiety and Depression Scale (HADS)*. *British Journal of Clinical*  
49 501 *Psychology*, 2007. **46**: p. 1-18.



- 1  
2 502 44. Tennant, A. and J.F. Pallant, *DIF matters: A practical approach to test if Differential Item*  
3 503 *Functioning makes a difference*. Rasch Measurement Transactions, 2007. **24**(2): p. 1082-84.  
4 504 45. Smith, R.M., *Fit analysis in latent trait measurement models*. J Appl Meas, 2000. **1**(2): p. 199-  
5 505 218.  
6 506 46. Andrich, D., et al., *RUMM: A windows-based item analysis program employing Rasch*  
7 507 *unidimensional measurement models*. Perth, Australia: Murdoch University, 2000.  
8 508 47. Romanoski, J. and G. Douglas, *Test scores, measurement, and the use of analysis of variance:*  
9 509 *an historical overview*. J Appl Meas, 2002. **3**(3): p. 232-42.  
10 510 48. Dickens, G.L., et al., *Factor validation and Rasch analysis of the individual recovery outcomes*  
11 511 *counter*. Disabil Rehabil, 2017: p. 1-12.  
12 512 49. Jones, P.W., et al., *Development and first validation of the COPD Assessment Test*. Eur Respir  
13 513 J, 2009. **34**(3): p. 648-54.  
14 514 50. McDowell, J., et al., *Validation of the Australian/English version of the Diabetes Management*  
15 515 *Self-Efficacy Scale*. Int J Nurs Pract, 2005. **11**(4): p. 177-84.  
16 516 51. Uddin, M.N. and F.M.A. Islam, *Psychometric evaluation of an interview-administered version*  
17 517 *of the WHOQOL-BREF questionnaire for use in a cross-sectional study of a rural district in*  
18 518 *Bangladesh: an application of Rasch analysis*. BMC Health Services Research, 2019. **19**(1): p.  
19 519 216.  
20 520 52. Fassaert, T., et al., *Psychometric properties of an interviewer-administered version of the*  
21 521 *Kessler Psychological Distress scale (K10) among Dutch, Moroccan and Turkish respondents*.  
22 522 International Journal of Methods in Psychiatric Research, 2009. **18**(3): p. 159-168.  
23 523 53. Eaton, N.R., et al., *An invariant dimensional liability model of gender differences in mental*  
24 524 *disorder prevalence: evidence from a national sample*. J Abnorm Psychol, 2012. **121**(1): p.  
25 525 282-8.  
26 526 54. Baillie, A.J., *Predictive gender and education bias in Kessler's psychological distress Scale*  
27 527 *(K10)*. Social Psychiatry and Psychiatric Epidemiology, 2005. **40**(9): p. 743-748.  
28 528 55. Kessler, R.C., Foster, C., Webster, P. S., & House, J. S., *The relationship between age and*  
29 529 *depressive symptoms in two national surveys*. Psychology and Aging, 1992. **7**(1): p. 119-126.  
30 530 56. Feinson, M.C., *Are Psychological Disorders Most Prevalent among Older Adults - Examining*  
31 531 *the Evidence*. Social Science & Medicine, 1989. **29**(10): p. 1175-1181.  
32 532 57. Newmann, J.P., *Aging and Depression*. Psychology and Aging, 1989. **4**(2): p. 150-165.  
33 533 58. Roberts, R.E., *Reliability of the CES-D Scale in different ethnic contexts*. Psychiatry Res, 1980.  
34 534 **2**(2): p. 125-34.  
35 535 59. Miech, R., C. Power, and W.W. Eaton, *Disparities in psychological distress across education*  
36 536 *and sex: a longitudinal analysis of their persistence within a cohort over 19 years*. Annals of  
37 537 Epidemiology, 2007. **17**(4): p. 289-295.  
38 538 60. Kessler, R.C., *A disaggregation of the relationship between socioeconomic status and*  
39 539 *psychological distress*. American Sociological Review, 1982: p. 752-764.  
40 540 61. Kosidou, K., et al., *Socioeconomic status and risk of psychological distress and depression in*  
41 541 *the Stockholm Public Health Cohort: A population-based study*. Journal of Affective Disorders,  
42 542 2011. **134**(1-3): p. 160-167.  
43 543 62. Asún, R.A., K. Rdz-Navarro, and J.M. Alvarado, *The sirens' call in psychometrics: The*  
44 544 *invariance of IRT models*. Theory & Psychology, 2017. **27**(3): p. 389-406.  
45 545 63. Fan, X.T., *Item response theory and classical test theory: An empirical comparison of their*  
46 546 *item/person statistics*. Educational and Psychological Measurement, 1998. **58**(3): p. 357-381.  
47 547 64. Hagquist, C., M. Bruce, and J.P. Gustavsson, *Using the Rasch model in nursing research: An*  
48 548 *introduction and illustrative example*. International Journal of Nursing Studies, 2009. **46**(3): p.  
49 549 380-393.  
50  
51  
52  
53  
54  
55  
56  
57

1

2 550

3

4 551

5

552 **Fig. 1** The study location that includes a geographic area and data collection points

6

7

8 553 **Fig. 2** Threshold maps of the of further validation of K7 scale

9

10 554 **Fig. 3** Category probability curve of all the items

11

12 555 **Fig. 4** Dimensionality testing of K7 scale

13

14 556

15

16 557

17

18 558

19

19 559

20

21 560

22

22 561

23

24 562

25

26 563

27

27 564

28

29 565

30

31 566

32

32 567

33

34 568

35

36 569

37

37 570

38

39 571

40

41 572

42

43 573

44

44 574

45

46 575

47

48 576

49

49 577

50

51 578

52

53 579

54

55 580

56

56 581

57

58

59

60

For peer review only

**Consent Form:**

Interviewer note: Should be completed from one of the eligible members of aged  $\geq 18$  years

**Patient's consent**

We are screening to identify people with depression and its risk factors, in people of aged  $\geq 18$  years. The survey will increase your awareness of the disease outcome and its risk factors. The community will be benefitted from this study through the intervention programs those the Organisation for Rural Community Development intend to conduct in the future. We do not expect any risk for you if you participate in this study. Upon the completion, the results will be published in both national and international Journal but your individual information will be kept confidential and your identification will not be disclosed. We expect to continue our study for a longer period for which we may invite you again to participate in our study. However, you are free to change your mind and can withdraw from the study anytime without any obligation if you want.

Please provide your signature or thumb imprint if you agree

Signature/thumb imprint

Signature by the interviewer if the participant cannot provide signature.

1  
2  
3  
4  
5  
6  
7  
8  
9  
10  
11  
12  
13  
14  
15  
16  
17  
18  
19  
20  
21  
22  
23  
24  
25  
26  
27  
28  
29  
30  
31  
32  
33  
34  
35  
36  
37  
38  
39  
40  
41  
42  
43  
44  
45  
46  
47  
48  
49  
50  
51  
52  
53  
54  
55  
56  
57  
58  
59  
60

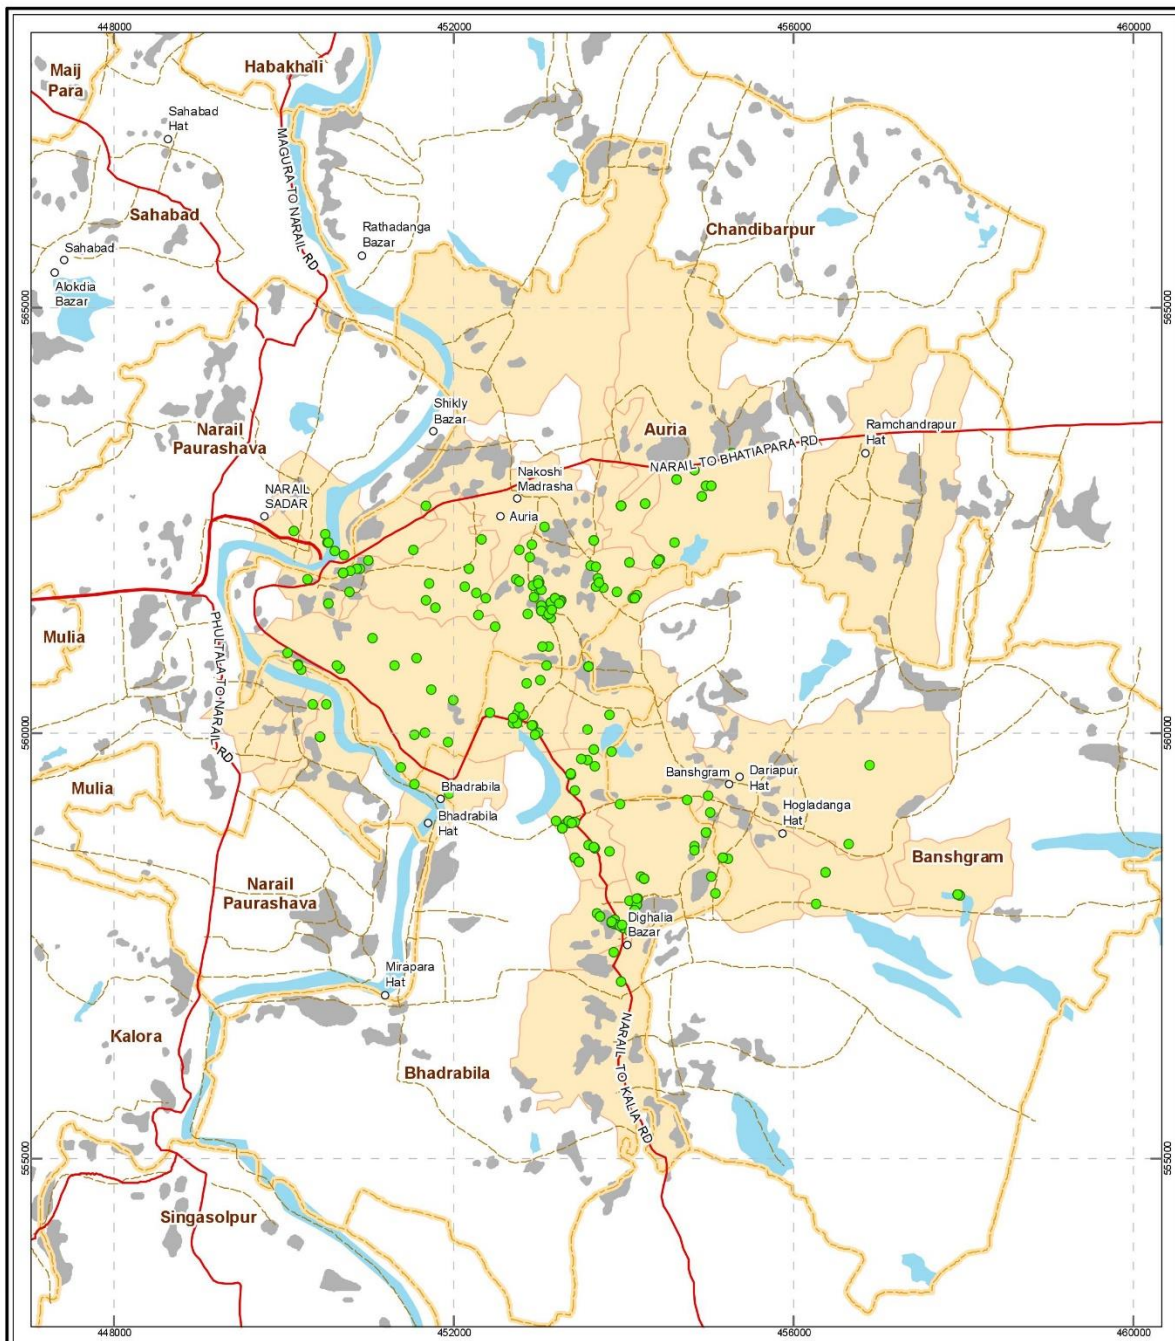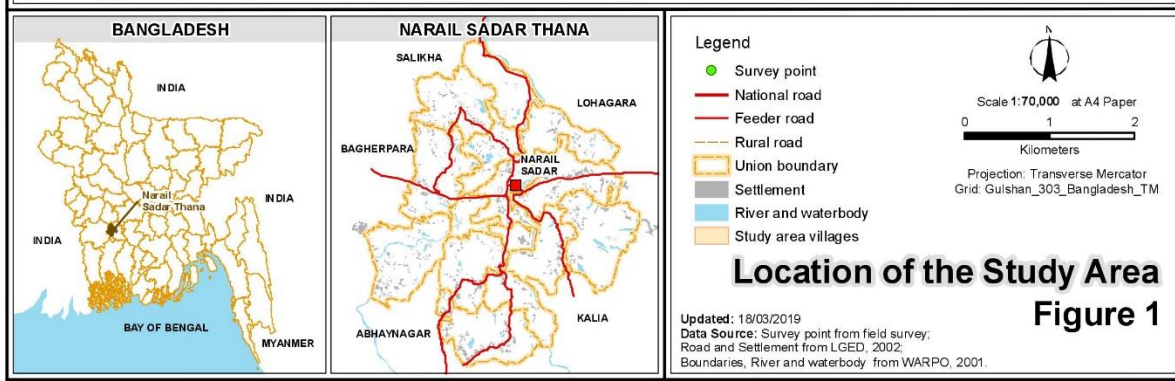

1  
2  
3  
4  
5  
6  
7  
8  
9  
10  
11  
12  
13  
14  
15  
16  
17  
18  
19  
20  
21  
22  
23  
24  
25  
26  
27  
28  
29  
30  
31  
32  
33  
34  
35  
36  
37  
38  
39  
40  
41  
42  
43  
44  
45  
46  
47  
48  
49  
50  
51  
52  
53  
54  
55  
56  
57  
58  
59  
60

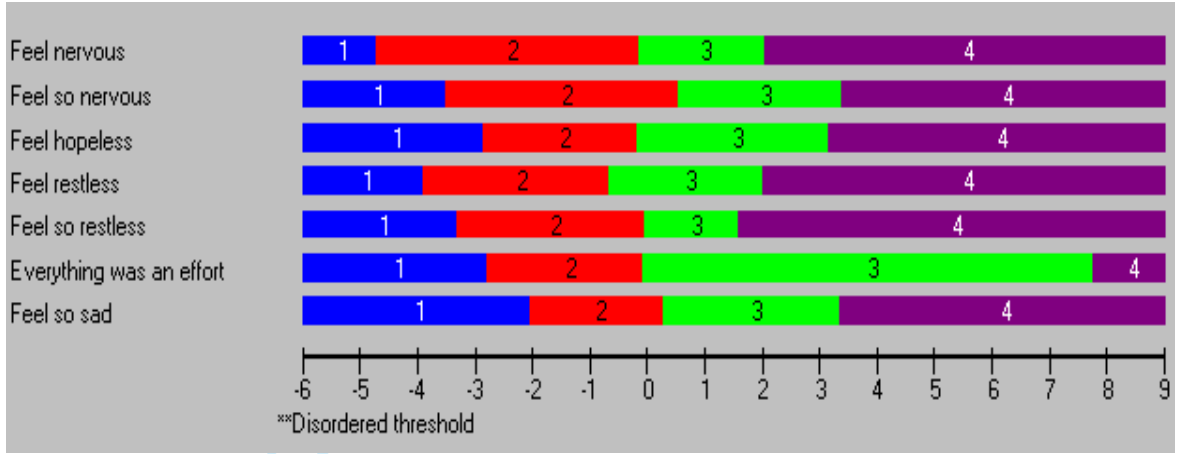

For peer review only



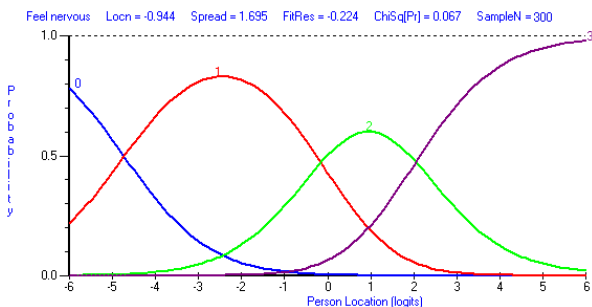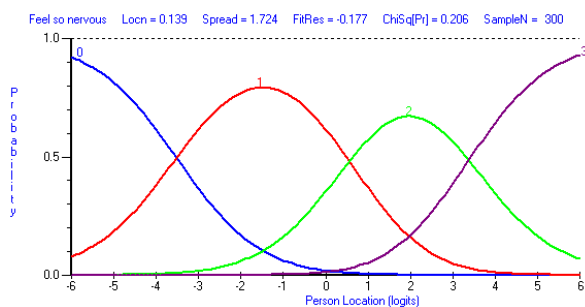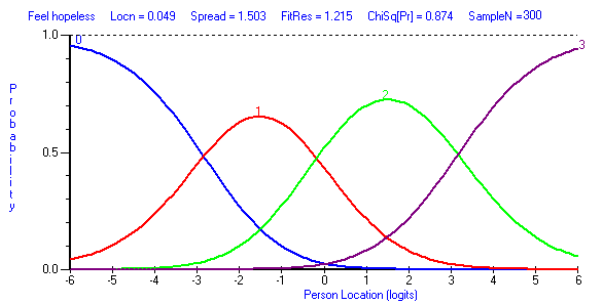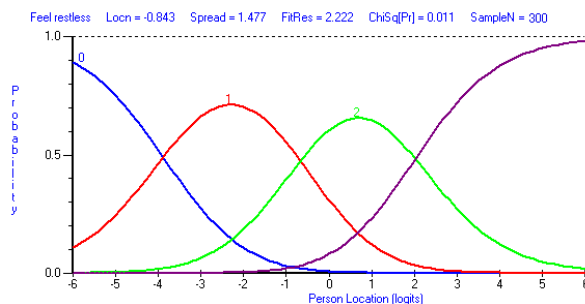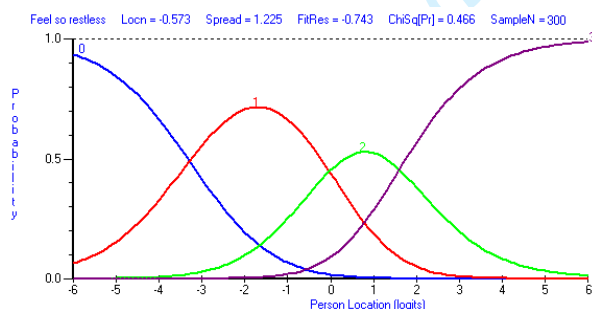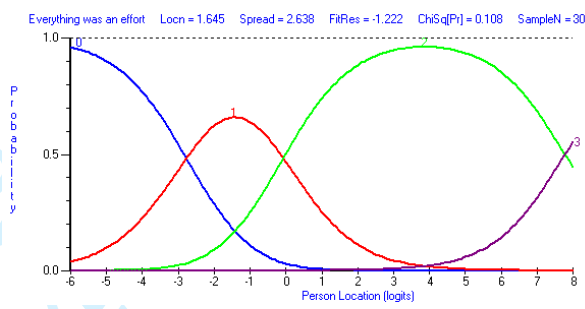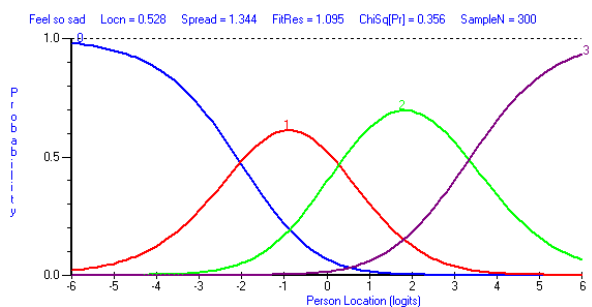

1  
2  
3  
4  
5  
6  
7  
8  
9  
10  
11  
12  
13  
14  
15  
16  
17  
18  
19  
20  
21  
22  
23  
24  
25  
26  
27  
28  
29  
30  
31  
32  
33  
34  
35  
36  
37  
38  
39  
40  
41  
42  
43  
44  
45  
46  
47  
48  
49  
50  
51  
52  
53  
54  
55  
56  
57  
58  
59  
60

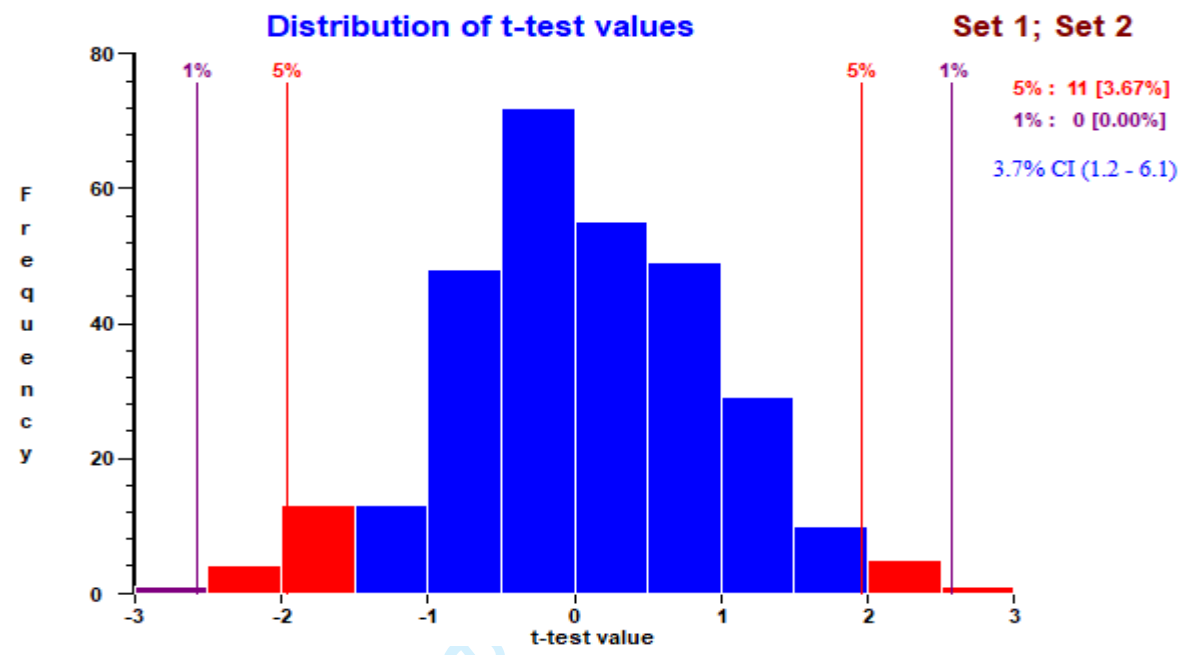

Peer review only

**STROBE 2007 Statement—Checklist of items that should be included in reports of *cross-sectional studies***

| Section/Topic            | Item # | Recommendation                                                                                                                                                                       | Reported on page #                                                                                                                                 |
|--------------------------|--------|--------------------------------------------------------------------------------------------------------------------------------------------------------------------------------------|----------------------------------------------------------------------------------------------------------------------------------------------------|
| Title and abstract       | 1      | (a) Indicate the study's design with a commonly used term in the title or the abstract                                                                                               | Pages 1-3                                                                                                                                          |
|                          |        | (b) Provide in the abstract an informative and balanced summary of what was done and what was found                                                                                  | Pages 2-3                                                                                                                                          |
| <b>Introduction</b>      |        |                                                                                                                                                                                      |                                                                                                                                                    |
| Background/rationale     | 2      | Explain the scientific background and rationale for the investigation being reported                                                                                                 | Page 4, background                                                                                                                                 |
| Objectives               | 3      | State specific objectives, including any prespecified hypotheses                                                                                                                     | Page 6, paragraph 2                                                                                                                                |
| <b>Methods</b>           |        |                                                                                                                                                                                      |                                                                                                                                                    |
| Study design             | 4      | Present key elements of study design early in the paper                                                                                                                              | Page 6, sampling frame                                                                                                                             |
| Setting                  | 5      | Describe the setting, locations, and relevant dates, including periods of recruitment, exposure, follow-up, and data collection                                                      | Page 6, study population                                                                                                                           |
| Participants             | 6      | (a) Give the eligibility criteria, and the sources and methods of selection of participants                                                                                          | Pages 6-7, sample size and statistical power and sample frame, data collection using CommCare and also more details in the protocol paper (ref 27) |
| Variables                | 7      | Clearly define all outcomes, exposures, predictors, potential confounders, and effect modifiers. Give diagnostic criteria, if applicable                                             | Page 8 Outcome measure and differential item functioning (DIF)                                                                                     |
| Data sources/measurement | 8*     | For each variable of interest, give sources of data and details of methods of assessment (measurement). Describe comparability of assessment methods if there is more than one group | Page 7, 9 and pages 10-12                                                                                                                          |
| Bias                     | 9      | Describe any efforts to address potential sources of bias                                                                                                                            |                                                                                                                                                    |
| Study size               | 10     | Explain how the study size was arrived at                                                                                                                                            | Page 6, sample size and statistical power                                                                                                          |
| Quantitative variables   | 11     | Explain how quantitative variables were handled in the analyses. If applicable, describe which groupings were chosen and why                                                         | Pages 8-9, the Rasch model                                                                                                                         |
| Statistical methods      | 12     | (a) Describe all statistical methods, including those used to control for confounding                                                                                                | Pages 8-9, the Rasch model                                                                                                                         |
|                          |        | (b) Describe any methods used to examine subgroups and interactions                                                                                                                  | Pages 8-9, the Rasch model                                                                                                                         |
|                          |        | (c) Explain how missing data were addressed                                                                                                                                          | N/A                                                                                                                                                |
|                          |        | (d) If applicable, describe analytical methods taking account of sampling strategy                                                                                                   | Page 7, sampling frame and In protocol paper (ref 27)                                                                                              |
|                          |        | (e) Describe any sensitivity analyses                                                                                                                                                |                                                                                                                                                    |



|    |                          |     |                                                                                                                                                                                                              |                                                     |
|----|--------------------------|-----|--------------------------------------------------------------------------------------------------------------------------------------------------------------------------------------------------------------|-----------------------------------------------------|
| 1  | <b>Results</b>           |     |                                                                                                                                                                                                              |                                                     |
| 2  | Participants             | 13* | (a) Report numbers of individuals at each stage of study—eg numbers potentially eligible, examined for eligibility, confirmed eligible, included in the study, completing follow-up, and analysed            | Pages 10-11                                         |
| 3  |                          |     | (b) Give reasons for non-participation at each stage                                                                                                                                                         | N/A                                                 |
| 4  |                          |     | (c) Consider use of a flow diagram                                                                                                                                                                           | N/A                                                 |
| 5  | Descriptive data         | 14* | (a) Give characteristics of study participants (eg demographic, clinical, social) and information on exposures and potential confounders                                                                     | Table 1, Overview of respondents and on pages 10-11 |
| 6  |                          |     | (b) Indicate number of participants with missing data for each variable of interest                                                                                                                          |                                                     |
| 7  | Outcome data             | 15* | Report numbers of outcome events or summary measures                                                                                                                                                         | Page 12-14                                          |
| 8  | Main results             | 16  | (a) Give unadjusted estimates and, if applicable, confounder-adjusted estimates and their precision (eg, 95% confidence interval). Make clear which confounders were adjusted for and why they were included | Page 12-14, Table 2-5                               |
| 9  |                          |     | (b) Report category boundaries when continuous variables were categorized                                                                                                                                    | N/A                                                 |
| 10 |                          |     | (c) If relevant, consider translating estimates of relative risk into absolute risk for a meaningful time period                                                                                             |                                                     |
| 11 | Other analyses           | 17  | Report other analyses done—eg analyses of subgroups and interactions, and sensitivity analyses                                                                                                               |                                                     |
| 12 | <b>Discussion</b>        |     |                                                                                                                                                                                                              |                                                     |
| 13 | Key results              | 18  | Summarise key results with reference to study objectives                                                                                                                                                     | Page 14, Discussion, paragraph 1                    |
| 14 | Limitations              | 19  | Discuss limitations of the study, taking into account sources of potential bias or imprecision. Discuss both direction and magnitude of any potential bias                                                   | Page 17, Paragraph 2                                |
| 15 | Interpretation           | 20  | Give a cautious overall interpretation of results considering objectives, limitations, multiplicity of analyses, results from similar studies, and other relevant evidence                                   | Pages 14-17                                         |
| 16 | Generalisability         | 21  | Discuss the generalisability (external validity) of the study results                                                                                                                                        | Pages 17-18, Conclusion                             |
| 17 | <b>Other information</b> |     |                                                                                                                                                                                                              |                                                     |
| 18 | Funding                  | 22  | Give the source of funding and the role of the funders for the present study and, if applicable, for the original study on which the present article is based                                                | Page 18, Funding                                    |

\*Give information separately for cases and controls in case-control studies and, if applicable, for exposed and unexposed groups in cohort and cross-sectional studies.

**Note:** An Explanation and Elaboration article discusses each checklist item and gives methodological background and published examples of transparent reporting. The STROBE checklist is best used in conjunction with this article (freely available on the Web sites of PLoS Medicine at <http://www.plosmedicine.org/>, Annals of Internal Medicine at <http://www.annals.org/>, and Epidemiology at <http://www.epidem.com/>). Information on the STROBE Initiative is available at [www.strobe-statement.org](http://www.strobe-statement.org).

# BMJ Open

**Psychometric evaluation of the modified Kessler seven-item version (K7) for measuring psychological distress using Rasch analysis. A cross-sectional study in a rural district of Bangladesh.**

|                                 |                                                                                                                                                                                                              |
|---------------------------------|--------------------------------------------------------------------------------------------------------------------------------------------------------------------------------------------------------------|
| Journal:                        | <i>BMJ Open</i>                                                                                                                                                                                              |
| Manuscript ID                   | bmjopen-2019-034523.R1                                                                                                                                                                                       |
| Article Type:                   | Original research                                                                                                                                                                                            |
| Date Submitted by the Author:   | 09-Jan-2020                                                                                                                                                                                                  |
| Complete List of Authors:       | Uddin, Mohammed ; Swinburne University of Technology, Department of Statistics, Data science and Epidemiology<br>Islam, Fakir; Swinburne University of Technology, Statistics, Data Science and Epidemiology |
| <b>Primary Subject Heading</b>: | Health services research                                                                                                                                                                                     |
| Secondary Subject Heading:      | Health informatics                                                                                                                                                                                           |
| Keywords:                       | Kessler psychological distress scale, Rasch analysis, Validation, Rural Bangladesh, K7                                                                                                                       |
|                                 |                                                                                                                                                                                                              |

SCHOLARONE™  
Manuscripts



I, the Submitting Author has the right to grant and does grant on behalf of all authors of the Work (as defined in the below author licence), an exclusive licence and/or a non-exclusive licence for contributions from authors who are: i) UK Crown employees; ii) where BMJ has agreed a CC-BY licence shall apply, and/or iii) in accordance with the terms applicable for US Federal Government officers or employees acting as part of their official duties; on a worldwide, perpetual, irrevocable, royalty-free basis to BMJ Publishing Group Ltd ("BMJ") its licensees and where the relevant Journal is co-owned by BMJ to the co-owners of the Journal, to publish the Work in this journal and any other BMJ products and to exploit all rights, as set out in our [licence](#).

The Submitting Author accepts and understands that any supply made under these terms is made by BMJ to the Submitting Author unless you are acting as an employee on behalf of your employer or a postgraduate student of an affiliated institution which is paying any applicable article publishing charge ("APC") for Open Access articles. Where the Submitting Author wishes to make the Work available on an Open Access basis (and intends to pay the relevant APC), the terms of reuse of such Open Access shall be governed by a Creative Commons licence – details of these licences and which [Creative Commons](#) licence will apply to this Work are set out in our licence referred to above.

Other than as permitted in any relevant BMJ Author's Self Archiving Policies, I confirm this Work has not been accepted for publication elsewhere, is not being considered for publication elsewhere and does not duplicate material already published. I confirm all authors consent to publication of this Work and authorise the granting of this licence.

1  
2 1 **Title: Psychometric evaluation of the modified Kessler seven-item version (K7) for measuring**  
3  
4 2 **psychological distress using Rasch analysis. A cross-sectional study in a rural district of**  
5  
6 3 **Bangladesh.**  
7

8  
9 4 Mohammed Nazim Uddin<sup>1</sup>, Fakir M Amirul Islam<sup>1,2</sup>

- 10  
11 5 1. Department of Statistics, Data Science and Epidemiology; Faculty of Health, Arts and Design;  
12  
13 6 Swinburne University of Technology, Hawthorn VIC 3122, Australia  
14  
15 7 2. Organisation for Rural Community Development, Dariapur, Narail, Bangladesh  
16  
17

18 8  
19  
20 9 Email: Mohammed Nazim Uddin – [mnuddin@swin.edu.au](mailto:mnuddin@swin.edu.au); Fakir M Amirul Islam –  
21  
22 10 [fislam@swin.edu.au](mailto:fislam@swin.edu.au)  
23  
24

25 11  
26  
27 12 \*Corresponding author:  
28

29 13 Email: [mnuddin@swin.edu.au](mailto:mnuddin@swin.edu.au)  
30  
31  
32 14  
33  
34 15  
35  
36 16  
37  
38  
39 17  
40  
41 18  
42  
43 19  
44  
45 20  
46  
47  
48 21  
49  
50 22  
51  
52 23  
53  
54  
55 24  
56  
57

1  
2 25 **Abstract**

3  
4 26 **Objectives** This investigation expected to validate the psychometric properties of the modified 7-item  
5  
6  
7 27 Kessler psychological distress scale (K7) for measuring psychological distress in healthy rural population  
8  
9 28 of Bangladesh.

10  
11 29 **Design** Cross-sectional study.

12  
13 30 **Setting** Narail district, Bangladesh.

14  
15  
16 31 **Participants** A random sample of 300 adults of age 18–90 years were recruited. Face-to-face interviews  
17  
18 32 were conducted between July and August 2018 using an Android phone installed with a mobile data  
19  
20 33 collection application known as CommCare.

21  
22 34 **Outcome measure** Validation of the K7 was the major outcome. Sociodemographic factors were  
23  
24 35 measured to assess for Differential Item Functioning (DIF) to check if the tool functions equally in  
25  
26 36 different factors. Rasch analysis was carried out for the validation of the K7 scale in the healthy rural  
27  
28 37 population of Bangladesh. RUMM2030 was used for the analyses.

29  
30 38 **Results:** Results showed good overall fit, as indicated by a non-significant item-trait interaction  
31  
32 39 ( $\chi^2=44.54$ ,  $df=28$ ,  $p=0.0245$ ) compared with a Bonferroni adjusted  $p$ -value of 0.007. Both item fit  
33  
34 40 (mean=0.30, SD=1.22) and person fit residuals (mean=-0.18, SD=0.85) showed perfect fit. Reliability  
35  
36 41 was very good as indicated by a person separation index (PSI)=0.85 and Cronbach's Alpha (CA)=0.89.  
37  
38 42 All individual items were ordered thresholds. The K7 scale showed adequate reliability,  
39  
40 43 unidimensionality and was free from local dependency. The K7 scale also showed similar functioning  
41  
42 44 for adults and older adults, males and females, no education and any level of education, and at least some  
43  
44 45 financial instability vs. no financial instability.

45  
46 46 **Conclusions:** Validation of K7 scale confirmed that the tool is suitable for measuring psychological  
47  
48 47 distress among the rural Bangladeshi population. Further research should validate the K7 scale in  
49  
50 48 different rural settings in Bangladesh to determine a valid cutoff score for assessment of severity levels  
51  
52  
53  
54  
55  
56

1  
2 49 of psychological distress. The K7 scale should also be tested in other developing countries where socio-  
3  
4 50 demographic characteristics are similar to those of Bangladesh.  
5

6 51  
7  
8  
9 52 **Keywords:** Kessler psychological distress scale, Rasch analysis, Validation, Rural Bangladesh  
10

### 11 53 **Strengths and limitations of this study**

- 12  
13 54 ➤ This study provides the first reliable data on the Kessler K7 scale from a general population of a  
14  
15 typical rural district of Bangladesh.
- 16 55  
17  
18 56 ➤ This study used primary data on a K7 scale and application of the Rasch analysis technique was  
19  
20 57 applied to validate the K7 scale instead of Classical Test Theory (CCT).
- 21  
22 58 ➤ The data were collected through face-to-face interviews to increase the accuracy of data.
- 23  
24  
25 59 ➤ The study provides a unique opportunity to assess psychological distress in a rural population of  
26  
27 60 Bangladesh by using reasonably fewer items.
- 28  
29 61 ➤ The potential drawback of this study is that it is based on a single-occasion collection of data  
30  
31 62 from a rural district in Bangladesh which preventing test-retest evaluation or comparison of  
32  
33 63 alternate versions of the same measures.  
34  
35  
36  
37 64  
38 65  
39  
40 66  
41  
42 67  
43  
44 68  
45  
46  
47 69  
48  
49 70  
50  
51 71  
52  
53 72  
54  
55  
56 73  
57

1  
2 74 **Background**

3  
4 75 Globally, one out of every four individuals is influenced by mental or psychological distress at some  
5  
6 76 point in their lives [1]. Almost 66% of individuals experiencing psychological distress fail to look for  
7  
8 77 assistance because they were unaware of, or neglect their disorder [2]. Due to the rapid growth of mental  
9  
10 78 disorders, there is a need to identify risk conditions quickly in a cost-effective manner [3]. Early diagnosis  
11  
12 79 of psychological distress has been seen as an essential measure to guarantee successful, focused, effective  
13  
14 80 and targeted intervention for patients experiencing psychological distress [4]. In recent years, researchers  
15  
16 81 have primarily been interested in early diagnosis of psychological distress and used tools with a very  
17  
18 82 limited number of items for measuring psychological distress among the general population [5].  
19  
20 83 Therefore, the development and continued validation of the tools used for measuring psychological  
21  
22 84 distress is critical, especially for early detection of psychological instability.  
23  
24  
25  
26

27 85  
28  
29 86 Typically, large epidemiologic studies of mental health have used detailed and interviewer-administered  
30  
31 87 diagnostic interviews; replicating this method is considered cost-effective for general population [6]. A  
32  
33 88 variety of these diagnostic screening interviews are now accessible, these include the Diagnostic  
34  
35 89 Interview Schedule [7], Composite International Diagnostic Interview [8], and the Mini-International  
36  
37 90 Neuropsychiatric Interview [9]. Dimensional measures of non-specific psychological distress have come  
38  
39 91 to take on new importance because it distinguishes people based on severity level rather than purely on  
40  
41 92 diagnosis. Over the last three decades, large-scale epidemiological studies used screening measures to  
42  
43 93 provide a quick measure of the prevalence of psychological distress [10-13]. However, most of the tools  
44  
45 94 have an extensive list of items which have been limited to the use of widely accepted tools aimed at the  
46  
47 95 screening of psychological distress among the general population.  
48  
49  
50  
51  
52

53 96  
54  
55  
56  
57

1  
2 97 The Kessler 10-item scale (K10) is an exception. Developed by Professors' Kessler and Mroczek in 1992,  
3  
4 98 K10 was designed to be utilised in the United States National Health Interview Survey as a brief measure  
5  
6 99 of non-explicit psychological distress along with the anxiety-depression spectrum [14]. The K10 and the  
7  
8  
9 100 six-item scale K6 was developed concurrently with experimental instruments for assessing psychological  
10  
11 101 distress in people with a variety of mental disorders [15]. The six items for K6 is included in K10. The  
12  
13 102 K10 and the K6 have been translated and validated in at least 14 countries worldwide [6, 16-18]. The  
14  
15  
16 103 K10 tool was initially developed to recognise the levels of non-specific psychological distress in the  
17  
18 104 general population and was employed in many countries including Australia, Canada and the USA [15,  
19  
20 105 19-21]. The World Health Organization's World Mental Health Survey also used this tool [22]. The tool  
21  
22 106 has also identified a substantial association with severe mental illnesses [23]. As such, clinicians  
23  
24  
25 107 recommend utilisation of the K10 and the K6 to screen for psychological distress [24, 25]. Although both  
26  
27 108 scales have been validated with various populations and languages, research has indicated that the factor  
28  
29 109 structures of the K10 and the K6 scales differ. For example, one study outlined discrepancies between  
30  
31  
32 110 the K6's one-factor and two-factor structures [16] while another study outlined discrepancies between  
33  
34 111 the K10's two-factor and four-factor structures [17]. In addition, both the K10 and the K6 cross-cultural  
35  
36 112 validity was not employed in any rural settings including the rural populations of Bangladesh. Such  
37  
38  
39 113 variations in factor structures suggest that further research is needed on the psychometric properties of  
40  
41 114 the K10 and the K6 instruments.

42  
43 115  
44  
45 116 Bangladesh is a densely populated country with a population of 167 million people; around 65% of them  
46  
47  
48 117 live in rural areas [26, 27]. Psychological distress has been found to be a significant public health concern  
49  
50 118 especially in rural areas [28-31]. The prevalence of mental disorders varies notably in rural areas, ranging  
51  
52 119 from 6.5% to 31% of the total population, conceivably due to the utilisation of diverse conventions,  
53  
54  
55 120 different measuring tools and various meanings associated with mental disorders [32]. Further, there has



1  
2 121 been no culturally sensitive tool available for rapid screening of psychological distress in Bangladesh.  
3  
4 122 Recently, Uddin et al. validated the K10 scale using the Rasch analysis technique in a rural area of  
5  
6 123 Bangladesh and proposed a modified version of a seven items K7 scale. The K7, which is a subset of the  
7  
8  
9 124 K10 proved to be robust containing a four-point liker type scale instead of the five-point scale of the  
10  
11 125 original K10. The modified K7 version followed all assumptions of Rasch analysis and produced a  
12  
13 126 unidimensional tool for measuring psychological distress.  
14  
15

16 127  
17  
18 128 The K7 scale provides additional benefits. One is related to brevity offering ease of administration, and  
19  
20 129 the other is low cost to measure psychological distress through a shortened version of the K10 scale.  
21  
22 130 Given the widespread use of the K10 and the K6 scales, including the translated Bengali versions of K10  
23  
24  
25 131 scale [18], it is noteworthy that no empirical validation studies with Bengali speaking populations have  
26  
27 132 been reported in the literature review. The culturally validated instrument of the K7 scale can provide an  
28  
29 133 increasingly productive resource for health care services and can be applied in other developing countries  
30  
31  
32 134 with similar socio-demographic characteristics. However, further validation of the K7 scale with its four-  
33  
34 135 response categories is required to be used for rural populations of Bangladesh. Therefore, the current  
35  
36 136 study aims to provide validation of the modified version of the K7 scale for potential application within  
37  
38  
39 137 healthy population settings in rural Bangladesh.  
40  
41 138  
42

## 43 139 **Materials and Methods**

### 44 140 **Study Population**

45  
46  
47  
48 141 Bangladesh is a nation of 167 million individuals divided into 64 districts [26]. The male to female ratio  
49  
50 142 (48.9 to 51.1) was consistent in all over in Bangladesh [33]. Around 72.9% of individuals attained  
51  
52  
53 143 primary education or above as opposed to 27.1% had no education of the national population [34]. With  
54  
55 144 respect to the availability of funds, the population having insufficient funds some or most of the time  
56  
57

1  
2 145 accounted for 23.2% in Bangladesh [35]. Adult participants aged 18 to 90 years were selected from the  
3  
4 146 Narail Upazilla, which is located around 200 km south-west of Dhaka, the capital city of Bangladesh.  
5  
6 147 Interviews were conducted between July and August of 2018. The study area includes a specific  
7  
8  
9 148 geographic area and 300 survey points of data collection. Data were gathered from three unions (Auria,  
10  
11 149 Banshgram and Bhardabila) of the region. This has been described in detail in Fig. 1.  
12

### 13 150 14 15 16 151 **Sample Size and Statistical Power**

17  
18 152 A sample size of 300 adults of age 18-90 was used for this study. This sample size is appropriate for a  
19  
20 153 Rasch examination since large samples can potentially result in type 1 error that falsely dismiss an item  
21  
22 154 for not fitting the Rasch model [36]. A sample size of 300 is viewed as sufficiently substantial to ensure  
23  
24  
25 155 99% confidence that the item difficulty would be within  $\pm\frac{1}{2}$  logit of its stable value [37].  
26

### 27 156 28 29 30 157 **Sampling Frame**

31  
32 158 The cross-sectional study recruited a multi-stage cluster random sample of 320 participant from the rural  
33  
34 159 district Narail of Bangladesh in the period of July-August 2018. Data were collected from three unions  
35  
36 160 (the smallest rural administrative units) out of nine unions, excluding the four which were selected  
37  
38  
39 161 previously from the 13 unions of Narail Upazilla [38]. The selected unions are Auria, Banshgram and  
40  
41 162 Bhardabila. One village (the smallest territorial and social unit for administrative and representative  
42  
43 163 purposes), from each of the chosen unions, were randomly selected at the second level. The selected  
44  
45  
46 164 villages were Baliadanga, Fulshor and Rogunathpur. Two paras (further divisions of the village) from  
47  
48 165 each selected village were randomly chosen at the third level. In total, 40 adults (18–59 years old) and  
49  
50 166 40 older adults (60–90 years old) from each of the villages/wards were interviewed. Interviewers used a  
51  
52  
53 167 mobile data collection platform CommCare on their android phone to collect data from the respondents.  
54  
55 168 To mitigate the effect of selection bias, 320 respondents were used with an equal proportion of adults  
56  
57

1  
2 169 and older adults, further partitioned into gender. This study excluded 20 participants randomly as 300  
3  
4 170 participants were deemed sufficient for the Rasch Measurement Theory.  
5

### 6 171 7 8 9 172 **Data collection using CommCare and its advantage over using a printed questionnaire**

10  
11 173 Mobile data collection is a method employed to collect qualitative and quantitative inputs via a mobile  
12  
13 174 device (e.g. mobile phone, tablet, etc.). The introduction of mobile devices has mitigated streamlined and  
14  
15 making them more economical and less time consuming [39]. Other benefits include minimising  
16 175  
17 minimisation of human errors, speeding up reporting, increased flexibility in deploying programmatic  
18 176  
19 changes, and provision of accurate location information [40]. With the correct implementation of the  
20 177  
21 mobile data collection tool, these benefits can all be successfully implemented [41]. CommCare is a  
22 178  
23 customisable, mobile platform, which empowers non-developers to build mobile applications for data  
24 179  
25 collection [42]. CommCare allows mobile applications to run offline where gathered information can be  
26 180  
27 transmitted to CommCareHQ as internet connectivity becomes accessible [43].  
28 181  
29  
30  
31

32 182  
33  
34 183 The current study followed a strict protocol to ensure a smooth launch after the CommCare application  
35  
36 184 was finalised by pre-testing before training began [44]. The application was pilot tested with 30 people.  
37  
38 The testing found some minor problems associated with respondents not understanding the application  
39 185  
40 correctly. These concerns were addressed through an upgraded version of the application which was then  
41 186  
42 distributed for final data collection.  
43 187  
44  
45

### 46 188 47 48 189 **Modified Kessler Psychological Distress Scale (K7)**

49  
50 190 The K7 measures developed asked respondents to consider how regularly they encountered of depressive  
51  
52 191 and anxiety symptoms in the preceding four weeks before screening. Respondents were asked to express  
53  
54 how often the following seven symptoms occurred: they felt nervous, so nervous that nothing could calm  
55 192  
56  
57

1  
2 193 them down, hopeless, restless or fidgety, so restless that they could not sit still, so depressed that nothing  
3  
4 194 could cheer them up, everything was an effort [18]. Items were rated on a four-point liker type scale. The  
5  
6 195 answer to each question was allocated to a value of one, two, three, or four: "none of the time," "a little  
7  
8  
9 196 of the time," "some or most of the time" or "all the time" respectively.  
10

## 11 197 12 13 198 **Outcome measure**

14  
15  
16 199 The K7 scale is the main outcome measure for assessing psychological distress using Rasch analysis.  
17  
18 200 Demographic details were collected for age, gender and level of education and socio-economic  
19  
20 201 conditions.  
21  
22

## 23 202 24 25 203 **The Rasch Model**

26  
27 204 The Rasch model was named after Danish mathematician Georg Rasch [45]. The model shows what is  
28  
29 205 required for reactions to items if estimation (at the measurement level) is to be accomplished most  
30  
31 206 accurately. Two versions of the Rasch model are available: dichotomous [45] and polytomous [46]. In  
32  
33 207 this case, the polytomous Rasch model was used. The Rasch model consists mainly of two forms, the  
34  
35 208 rating scale model and the partial credit model, which can be used with polytomous results. The partial  
36  
37 209 credit model is the norm under RUMM2030, which does not restrict threshold parameters and enables  
38  
39 210 them to differ by item [47]. The likelihood ratio check, which is available in the RUMM2030 programme,  
40  
41 211 tests unregulated parameterization (partial credit model) toward reparameterization. The non-statistical  
42  
43 212 result shows that the definition of the rating scale is to be used, although statistically significant results  
44  
45 213 indicate that the partial credit model should be used [48]. An analysis was undertaken, and a significant  
46  
47 214 finding was found which encourages the use of the partial credit model.  
48  
49

50  
51  
52 215 The Rasch analysis utilised in this investigation was conducted using the software package RUMM 2030  
53  
54 216 [49]. The Rasch model makes a few hypotheses that should be assessed to guarantee an instrument has  
55  
56

1  
2 217 Rasch properties. The most ordinarily evaluated Rasch suspicions are a) unidimensionality, b) local  
3  
4 218 independence and c) invariability. Local independence means that the scores are related to each other  
5  
6 219 only through the construct, whereas unidimensionality means that only one construct is being measured  
7  
8  
9 220 and the invariance criterion implies that generally an instrument should function in the same way for all  
10  
11 221 individuals [50, 51]. As indicated by the Rasch demonstrate, the overall fit of the model is defined by  
12  
13 222 Chi-square item-trait interaction statistics [52]. With non-significance, at a Bonferroni-corrected level of  
14  
15  
16 223 0.007 (0.05/7 items), indicating adequate fit [53-56]. Item-person interaction statistics are exhibited as z-  
17  
18 224 statistics (mean=0 and standard deviation (SD)=1) and show ideal fit. Individual item fit (IFR)  
19  
20 225 measurements incorporate the residuals satisfactorily when inside the range  $\pm 2.5$  and a non-significant  
21  
22  
23 226 chi-square value [57].  
24  
25 227 A "threshold" parameter is characterized by two response options where either response is equally likely.  
26  
27 228 Disordered thresholds demonstrate that the respondents are not able to segregate between the response's  
28  
29  
30 229 choices. Disordered thresholds result in item misfit and can be redressed by combining two neighbouring  
31  
32 230 response options [58]. Following the principal component analysis (PCA) of the residuals, the  
33  
34 231 associations between items and the first PCA variables are used to describe two subsets of products. The  
35  
36 232 independent t-test is then used to determine the difference between the two subsets. The individual  
37  
38  
39 233 estimates, with a non-significant result or the lower bound variance of the binomial distributions by 5%  
40  
41 234 indicate no evidence of multidimensionality [59]. The person-item residuals correlation matrix can be  
42  
43 235 used to determine whether there is any local dependency between the items, and correlations less than  
44  
45  
46 236 0.3 are generally considered to be acceptable [48]. Differential item functioning (DIF) investigates  
47  
48 237 whether items operate similar function across different groups. An analysis of variance (ANOVA) has  
49  
50 238 been carried out for each item that compares scores across each group factor level (Age, sorted as either  
51  
52 239 adult (18 to 59 years) or older adult (60 to 85 years), sex (male or female), education (no education or at  
53  
54  
55 240 least primary) and socio-economic conditions low (insufficient funds most/some of the time) and high  
56  
57

1  
2 241 (balance/sufficient funds all the time)) and across construct levels. DIF was found to be present if the  
3  
4 242 ANOVA was significant with the Bonferroni correction (Bonferroni adjusted  $p$ -value of  $.05/7=.007$ ) [60,  
5  
6 243 61]. Rasch examination also gives a marker of reliability. In RUMM 2030, this is given by the Person  
7  
8  
9 244 Separation Index (PSI). The PSI of the Rasch analysis consists of indices developed as an approximation  
10  
11 245 of the proportion of the true or error-free variance. This applies throughout the distribution of person  
12  
13 246 estimates relative to the sum of this variance and error variance in these estimates. With Rasch  
14  
15  
16 247 measurement, instead of reliability indices, the person separation index is used. However, the person  
17  
18 248 separation index is analogous to Cronbach's alpha (CA) [62]. A value near 1 shows high internal  
19  
20 249 consistency and a value under 0.7 demonstrates low scale reliability [63].  
21  
22  
23 250

24  
25 251 **Patient and public involvement** Study participants were the generally people without any disease.  
26  
27 252 Public involvement for the research was obtained primarily informing the district commissioner, district  
28  
29 253 police super, civil surgeon, and various public representatives such as the Chairman of the union  
30  
31  
32 254 Parishad. A pilot survey was conducted and arranged a focus group discussion involving the general  
33  
34 255 public arranged as the questionnaire was developed. To maintain an approximately equal number of male  
35  
36 256 and female participants, one female was interviewed immediately after each male participant.  
37  
38  
39 257 Participants were not involved in the recruitment and conduct of the study. Results will be disseminated  
40  
41 258 via community briefs and presented at national and international conferences. Patient consent form can  
42  
43 259 be found in the supplementary materials.  
44  
45  
46 260

## 47 261 **Results**

48  
49  
50 262 Table 1 describes the socio-demographic characteristics of the participants by gender (male vs female).  
51  
52 263 The mean (standard deviation (SD), range) age of the participants was 52.0 years (15.6, 18-90). A  
53  
54 264 considerably large proportion (45.0%) of the populations did not have any formal education, with only  
55  
56  
57 265 1.3% attaining a bachelor's degree or above. The socio-economic condition for most respondents (about

1  
2 266 41.3%) was occasional financial instability, 32.3% experienced a precarious financial situation, 25.3%  
3  
4 267 experienced balance and 1.0% held sufficient funds most of the time  
5

6  
7 268 **Table 1** Sociodemographic characteristic of Gender in Narail Upazila in Bangladesh  
8

| Characteristic                                        | Total (300) | Female (150) | Male (150)  |
|-------------------------------------------------------|-------------|--------------|-------------|
|                                                       | Mean (SD)   | Mean (SD)    | Mean (SD)   |
| <b>Age (in years)</b>                                 | 52 (15.7)   | 51.7 (15.5)  | 52.8 (16.0) |
| <b>Age In group</b>                                   | Number (%)  | Number (%)   | Number (%)  |
| Adult                                                 | 150 (50.0)  | 75 (50.0)    | 75 (50.0)   |
| Elderly                                               | 150 (50.0)  | 75 (50.0)    | 75 (50.0)   |
| <b>Level of education (number of years schooling)</b> |             |              |             |
| No education                                          | 135 (45.0)  | 80 (53.3)    | 55 (36.7)   |
| Primary (1-5)                                         | 80 (26.7)   | 36 (24)      | 44 (29.3)   |
| Secondary (6-9)                                       | 64 (21.3)   | 31 (20.7)    | 33 (22)     |
| SSC or HSC Pass (10-12)                               | 17 (5.7)    | 3 (2.0)      | 14 (9.3)    |
| Degree or equivalent (13 -16)                         | 4 (1.3)     | 0            | 4 (2.7)     |
| <b>Socio-economic condition:</b>                      |             |              |             |
| Insufficient funds most of the time                   | 97 (32.3)   | 62 (41.3)    | 35 (23.3)   |
| Insufficient funds some of the time                   | 124 (41.3)  | 50 (33.3)    | 74 (49.3)   |
| Balance                                               | 76 (25.3)   | 37 (24.7)    | 39 (26)     |
| Sufficient funds most of the time                     | 3 (1.0)     | 1 (0.7)      | 2 (1.3)     |

31 269  
32  
33 270 The validation of the K7 scale showed good overall fit to the Rasch model with the Bonferroni adjusted  
34  
35 271 p-value of 0.007 ( $\chi^2 = 44.54$  df = 28,  $p = 0.0245$ ). The items fit residual (IFR) (mean = 0.30, SD = 1.22)  
36  
37 272 and the person fit residuals (PFR) (mean= -0.18, SD = 0.85) were within the acceptable range (Table 2).  
38  
39  
40 273 All seven items were found to have ordered thresholds (Fig. 2), suggesting the respondents have no  
41  
42 274 difficulty differentiating between the response's choices with the 4-point liker-type scale used in the K7  
43  
44 275 scale.  
45

46  
47 276  
48  
49 277 **Table 2** Overall model fit statistics of the K7 scale  
50

| Model fit statistics                | Total sample N=300 |
|-------------------------------------|--------------------|
| Overall model fit, Chi-square value | 44.54              |
| Degree of freedom (DF)              | 28                 |
| *P value                            | 0.0245             |



|                                                    |                     |
|----------------------------------------------------|---------------------|
| Item fit residuals (mean (SD))                     | 0.30 (1.22)         |
| Person fit residuals (mean (SD))                   | -0.18 (0.85)        |
| Person separation index (PSI)                      | 0.85                |
| Coefficient alpha                                  | 0.89                |
| Unidimensionality test (% that goes beyond 95% CI) | 3.7% CI (1.2 - 6.1) |

\*The *p*-value 0.007 means the significance at level 0.05 because the number of items is seven ( $0.05/7=0.007$ ). Therefore, any *p*-value greater than 0.007 would consider to be non-significant

No misfit or overfit items were identified with significant chi-square probability values. There was neither high positive nor high negative residual values ( $\pm 2.5$ ) observed. All seven individuals' item fit statistics showed a good fit with the Bonferroni adjusted *p* value of 0.007 (Table 3). The value of the PSI (0.85) for the original set of seven items with four response categories indicated that the scale worked well to separate persons. The value of the Cronbach's alpha (0.89) of the K7 scale demonstrates good internal consistency. A visual examination of the threshold map (Fig. 2) showed that the estimates of the thresholds defined the categories in all seven items that formed distinctive regions of the continuum. We also examined the category probability curve in which each response options systematically take turns, showing the highest probability of endorsement (Fig. 3).

**Table 3** Individuals' item fit statistics of the K7 scale

| Items                        | Individuals' items fit statistics of K7 scale |       |          |          |         |
|------------------------------|-----------------------------------------------|-------|----------|----------|---------|
|                              | Location                                      | SE    | Residual | $\chi^2$ | P value |
| Feel nervous (2)             | -0.944                                        | 0.124 | -0.224   | 8.78     | 0.067   |
| Feel so nervous (3)          | 0.139                                         | 0.123 | -0.177   | 5.91     | 0.206   |
| Feel hopeless (4)            | 0.049                                         | 0.112 | 1.215    | 1.23     | 0.874   |
| Feel restless or fidgety (5) | -0.843                                        | 0.110 | 1.993    | 13.09    | 0.011   |
| Feel so restless (6)         | -0.573                                        | 0.110 | -0.743   | 3.58     | 0.466   |
| Everything was an effort (8) | 1.645                                         | 0.115 | -1.222   | 7.58     | 0.108   |
| Feel so sad (9)              | 0.528                                         | 0.117 | 1.095    | 4.39     | 0.356   |

SE=Standard error, P value= Probability value



The K7 scale was assessed for DIF across gender (male/female), age (adults/older adults), education (no education/some education) and socio-economic conditions (low/high) (Table 4). No significant DIF was found for any of the items. The unidimensionality of the K7 scale was supported by independent t-tests comparing the person estimates with the principal component analysis (PCA) of the residuals; our findings indicated that only 3.7% (95% Confidence Interval: 1.2% to 6.1%) of cases showed statistically significant differences (Table 2 and Figure 4). There were no correlation coefficients above 0.30 on the person-item residual correlation matrix, indicating no local dependency of the items (Appendix 1)).

**Table 4** DIF on age, gender, educational attainment and socio-economic conditions on K7 scale

| Items                        | DIF on Age                    |      |    |         | DIF on Gender                    |      |    |         |
|------------------------------|-------------------------------|------|----|---------|----------------------------------|------|----|---------|
|                              | MS                            | F    | DF | P-value | MS                               | F    | DF | P-value |
| Feel nervous (2)             | 1.81                          | 2.25 | 1  | 0.135   | 1.26                             | 1.55 | 1  | 0.215   |
| Feel so nervous (3)          | 1.18                          | 1.46 | 1  | 0.228   | 0.14                             | 0.17 | 1  | 0.682   |
| Feel hopeless (4)            | 0.85                          | 0.87 | 1  | 0.351   | 3.45                             | 3.61 | 1  | 0.059   |
| Feel restless or fidgety (5) | 0.81                          | 0.80 | 1  | 0.373   | 0.93                             | 0.92 | 1  | 0.339   |
| Feel so restless (6)         | 2.20                          | 2.79 | 1  | 0.096   | 0.16                             | 0.20 | 1  | 0.655   |
| Everything was an effort (8) | 0.25                          | 0.34 | 1  | 0.560   | 0.64                             | 0.88 | 1  | 0.351   |
| Feel so sad (9)              | 0.77                          | 0.79 | 1  | 0.374   | 0.06                             | 0.06 | 1  | 0.800   |
| Items                        | DIF on Educational attainment |      |    |         | DIF on Socio-economic Conditions |      |    |         |
|                              | MS                            | F    | DF | P-value | MS                               | F    | DF | P-value |
| Feel nervous (2)             | 0.44                          | 0.55 | 1  | 0.458   | 0.00                             | 0.01 | 1  | 0.939   |
| Feel so nervous (3)          | 0.19                          | 0.22 | 1  | 0.637   | 0.34                             | 0.41 | 1  | 0.521   |
| Feel hopeless (4)            | 0.02                          | 0.02 | 1  | 0.897   | 0.84                             | 0.88 | 1  | 0.351   |
| Feel restless or fidgety (5) | 0.29                          | 0.28 | 1  | 0.597   | 2.18                             | 2.15 | 1  | 0.144   |
| Feel so restless (6)         | 0.02                          | 0.02 | 1  | 0.883   | 0.27                             | 0.34 | 1  | 0.559   |
| Everything was an effort (8) | 1.83                          | 2.48 | 1  | 0.117   | 0.48                             | 0.65 | 1  | 0.421   |
| Feel so sad (9)              | 0.01                          | 0.01 | 1  | 0.917   | 0.00                             | 0.00 | 1  | 0.955   |

DIF= Differential Item Functioning, MS= mean square, F= F test value, DF=Degrees of Freedom, P-value= Probability value

Figure 5 shows the person-item threshold distribution of the K7 scale. The person distribution is shown in the top half and the item thresholds in the bottom half. The average value of individual logit for the

1  
2 308 K7 scale was -0.227 showing well-targeted persons and items fit for the K7 scale. While a negative mean  
3  
4 309 value for the K7 measure may suggest that the participant was located at a lower level (e.g. psychological  
5  
6 310 distress) than the average level of the scale. Overall, the K7 scale was not too difficult to endorse.  
7  
8

## 9 311 10 312 **Discussion**

11  
12  
13 313 The current study investigated the psychometric performance of the K7 in a sample of a healthy and rural  
14  
15 314 Bangladeshi population. The inspiration behind the paper was to evaluate the appropriateness of the  
16  
17 315 modified K7 scale (which was prior validated from the K10 scale) survey for measuring psychological  
18  
19  
20 316 distress in rural Bangladesh. This paper includes Rasch examination to investigate a few issues  
21  
22 317 concerning the K7 scale. The article also incorporates the validity of the category scorings framework,  
23  
24 318 the fit of individual items and an evaluation of the potential predisposition of age-sex distribution,  
25  
26  
27 319 education attainment and socio-economic status.  
28

29 320  
30  
31 321 The K10 scale has recently experienced a thorough psychometric examination in rural Bangladesh  
32  
33 322 prompting the development of a K7 scale to measure psychological distress in rural Bangladesh [18].  
34  
35  
36 323 However, further K7 validation was required to confirm its use in rural settings. From the Rasch  
37  
38 324 examination point of view, the underlying illustrative examination focused on the present rural samples  
39  
40  
41 325 of Bangladesh. The modified K7 scale with four response classifications showed no redundancy (little  
42  
43 326 impact on the scale) and no misfit. Moreover, items were all order thresholds, while scale demonstrated  
44  
45 327 no proof of multi-dimensionality.  
46

47 328  
48  
49  
50 329 It was stated earlier that the scale would be one-dimensional, an important assumption for the  
51  
52 330 implementation of IRT used to develop K10 [15]. There is a difference in outcomes for different  
53  
54 331 populations with respect to the dimensional structure of the instrument. In some research, K10 and K6  
55  
56  
57 332 were proposed as unidimensional scales [15, 25]. However, other research proposed multidimensional

1  
2 333 of K10 and K6 scale [16, 17]. In line of the previous study reported K10 and K6 as unidimensional scales,  
3  
4 334 the findings of the current study further confirm the K7 as a unidimensional scale as it was earlier  
5  
6 335 proposed by Uddin et.al [18].  
7  
8

9 336  
10  
11 337 Several previous studies conducted around the world did not use Rasch analysis to validate the K10 or  
12  
13 338 K6 [14, 24, 64-69]. A comparison of this study with previous studies is limited using PSI. However,  
14  
15  
16 339 Uddin et al. [18] used Rasch analysis and developed the K7 scale that would be suitable for rural  
17  
18 340 Bangladesh. The current study recognised that the K7 scale CA was marginally below from the previous  
19  
20 341 estimates of CA; and the PSI was marginally superior to the previous estimates of PSI [18]. Moreover,  
21  
22 342 reliability (CA) was high in the current study and consistent with previous research [15, 66, 70, 71].  
23  
24  
25 343 Therefore, the current study results suggest that the translated items measure the same overall construct  
26  
27 344 of psychological distress in rural Bangladesh.  
28  
29

30 345  
31  
32 346 There has been controversy over the DIF associated with gender in psychological distress assessment  
33  
34 347 [72-74]. The predominant mental health problems are widely accepted as being associated with the level  
35  
36 348 of education, specifically, as it decreases psychological distress increases [73, 75-77]. The K7 scale  
37  
38  
39 349 demonstrated no DIF on sex and education level, which supports previous research findings from  
40  
41 350 Australia [73], Japan [78] and Bangladesh [18]. An investigation led by Kessler et al. recorded a  
42  
43 351 conventional arrangement of disparity in the association among age [79]. However, different  
44  
45  
46 352 investigations exhibited a stable nonlinear connection between age and psychological distress in a few  
47  
48 353 cross-sectional epidemiologic studies [80-83]. A negative relationship between socioeconomic position  
49  
50 354 and psychological distress has been established in the literature [84], with low socioeconomic status  
51  
52 355 associated with a higher level of psychological distress [85]. Although there may still be an association  
53  
54  
55  
56  
57

1  
2 356 between age/SES with psychological distress, the lack of DIF simply means that items function the same  
3  
4 357 way with regards to their psychometric properties, irrespective of age and SES group.  
5

6 358  
7  
8  
9 359 To our knowledge, this was the first psychometric assessment on the K7 scale to measure psychological  
10  
11 360 distress in Rural Bangladesh. Use of the Rasch estimation demonstrated in this study has strengthened  
12  
13 361 the viability of the K7 scale for measuring psychological distress in rural Bangladesh. The scale  
14  
15  
16 362 demonstrates ordered thresholds with no proof of DIF. Moreover, the scale showed high PSI (0.85) and  
17  
18 363 CA (0.89), which also showed the power of the test for fit. This study provides significant evidence that  
19  
20 364 a complete score of psychological distress can be measured and accelerates the finding of a legitimate  
21  
22 365 cut-off score for rural people in Bangladesh. Building up a cut-off score can help with evaluating the  
23  
24  
25 366 severity levels of psychological distress.  
26

27 367  
28  
29 368 The Rasch examination contributes valuable information on dimensions of psychological distress among  
30  
31  
32 369 the general rural population of Bangladesh. The study was based on a data set with a wide age  
33  
34 370 distribution, where data were collected directly through face-to-face interviews. Interviewers used a  
35  
36 371 mobile data collection platform CommCare to collect data from the respondents to minimising human  
37  
38  
39 372 error and speeding up reporting [44]. Further, the K7 scale applied by this method may work as a  
40  
41 373 productive screener for psychological distress across various service settings, including primary and  
42  
43 374 integrated care facilities. This can caution clinicians to patients who may benefit from a psychological  
44  
45  
46 375 distress assessment. The K7 scale can be made openly accessible in any health care setting as well as on  
47  
48 376 the web. Given its portability and straightforwardness in both web and paper formats, the K7 scale could  
49  
50 377 be made accessible individuals searching for a self-administer assessment measure.  
51

1  
2 379 The primary limitation of this study is that it depends on single-occasion data from people in a rural  
3  
4 380 region of Bangladesh, though we have attempted to validate the K7 scale in the rural area of Narail. The  
5  
6 381 investigation would be improved if a national delegate sample were available. The concern with fit  
7  
8  
9 382 statistics associated with the Rasch analysis is that the greater the sample size, the higher the likelihood  
10  
11 383 of finding the probability of detecting deviations from the Rasch model [86, 87]. Nevertheless, there are  
12  
13 384 no clear guidelines for sample size when implementing the Rasch Measurement Theory. [88]. Thus, we  
14  
15  
16 385 used the sample size of 300, which is more favoured [86]. Replication studies with large populated  
17  
18 386 samples of Bengali speakers may improve generalisation.

19  
20 387

## 21 22 23 388 **Conclusion**

24  
25 389 In conclusion, the study recommended the utilisation of the K7 scale in rural Bangladesh. The research  
26  
27 390 gleaned from this study suggests that a seven-item scale taken from the K10, with four-response  
28  
29 391 categories, would offer a robust psychometric scale. The K7 scale satisfies all the assumptions of the  
30  
31  
32 392 Rasch model. Examination of the K7 scale affirmed that the tool could also be utilised as a standard  
33  
34 393 measure of psychological distress. It could therefore provide a screening instrument for evaluating  
35  
36 394 psychological distress among the rural Bangladeshi population. Further, the tool can be applied in other  
37  
38  
39 395 developing nations experiencing similar socio-demographic attributes. In addition, the tool can be  
40  
41 396 connected within service settings to provide a national dimension using telemedicine, where mental  
42  
43 397 health conditions cannot be analysed.

44  
45 398

## 46 47 48 399 **Supplementary file**

49  
50 400 Additional materials related to patient consent form can be found in the supplementary file.

51  
52 40153  
54 402

## 403 **Abbreviations**

404 CA: Cronbach's Alpha, DIF: Differential Item Functioning, IFR: Item Fit Residuals, IRT: Item Response  
405 Theory, K7: Modified Seven Item Scale of Kessler Psychological Distress Scale, K10: Kessler  
406 Psychological Distress Scale, PCA: Principal Component Analysis PFR: Person Fit Residuals; PSI:  
407 Person Separation Index, SD: Standard Deviation

## 409 **Declarations**

### 410 *Acknowledgements*

411 We especially recognize the commitment of Md Mofijul Islam, Serajul Islam and Arzan Hosen for their  
412 diligent work in door-to-door data collection. We additionally recognise DR Mostofa Sarwar to assist us  
413 with building the mobile data collection platform using CommCare for data collection. Finally, we would  
414 like to offer our thanks to the investigation members for their wilful interest.

### 416 *Funding*

417 The author (Mohammed Nazim Uddin) used his own 'HRD Student Fund' from the Swinburne  
418 University of AUD 600 for data collection for this research project. The funder had no role in the  
419 investigation and its planning, information accumulation or examination, interpretation of data or writing  
420 of the manuscript.

### 422 *Data sharing statement*

423 The datasets used and/or analysed for the current study are available from the corresponding author upon  
424 request.

### 426 *Author Contributions*

1  
2 427 MNU and FMAI jointly structured the examination. MNU analysed the data and drafted the manuscript.  
3  
4 428 FMAI supervised and reviewed the manuscript. All authors contributed to the development of the  
5  
6 429 manuscript, read, and endorsed its final version.  
7  
8

9 430

10

11 431 ***Ethics approval and consent to participate***

12

13 432 All procedures performed in studies involving human participants were conducted in accordance with  
14  
15 the ethical standards of the institutional and/or national research committee and with the 1964 Helsinki  
16 433 declaration and its later amendments or comparable ethical standards. The ethics committee of the  
17  
18 434 Swinburne University of Technology Human Ethics Committee (SHR Project 2015/065 extended  
19  
20 435 endorsement got in July 2018) has granted ethics approvals. Written informed consent was acquired from  
21  
22 436 every individual member incorporated into the study.  
23  
24  
25 437

26

27 438

28

29 439 ***Consent for publication***

30

31 440 None applicable

32

33 441

34

35 442 ***Competing interests:***

36

37 443 The authors declare that they have no competing interest

38

39 444

40

41 445

42

43 446

44

45 447

46

47 448

48

49 449

50

51 450

52

53 451

54

55 452

56

57

58

59

60



1  
2 453 **References**  
3  
4 454

- 5 455 1. Organization, W.H., *The world health report: 2001. Mental health: new understanding, new*  
6 456 *hope. Geneva: WHO; 2001.* 2001: p. 1-5.
- 7 457 2. Svenaeus, F., *Diagnostic and statistical manual of mental disorders, 5th edition.* Medicine  
8 458 Health Care and Philosophy, 2014. **17**(2): p. 241-244.
- 9 459 3. Fard, K., R.W. Hudgens, and A. Weiner, *Undiagnosed Psychiatric Illness in Adolescents: A*  
10 460 *Prospective Study and Seven-Year Follow-up.* Archives of General Psychiatry, 1978. **35**(3): p.  
11 461 279-282.
- 12 462 4. Costello, E.J., *Early Detection and Prevention of Mental Health Problems: Developmental*  
13 463 *Epidemiology and Systems of Support.* Journal of Clinical Child and Adolescent Psychology,  
14 464 2016. **45**(6): p. 710-717.
- 15 465 5. Sunderland, M., A. Mahoney, and G. Andrews, *Investigating the Factor Structure of the*  
16 466 *Kessler Psychological Distress Scale in Community and Clinical Samples of the Australian*  
17 467 *Population.* Journal of Psychopathology and Behavioral Assessment, 2012. **34**(2): p. 253-259.
- 18 468 6. Kessler, R.C., et al., *Screening for serious mental illness in the general population with the K6*  
19 469 *screening scale: results from the WHO World Mental Health (WMH) survey initiative (vol 19,*  
20 470 *pg 4, 2010).* International Journal of Methods in Psychiatric Research, 2011. **20**(1): p. 62-62.
- 21 471 7. Robins, L.N., et al., *"National-Institute-of-Mental-Health Diagnostic Interview Schedule - Its*  
22 472 *History, Characteristics, and Validity.* Archives of General Psychiatry, 1981. **38**(4): p. 381-389.
- 23 473 8. Robins, L.N., et al., *The Composite International Diagnostic Interview - an Epidemiologic*  
24 474 *Instrument Suitable for Use in Conjunction with Different Diagnostic Systems and in Different*  
25 475 *Cultures.* Archives of General Psychiatry, 1988. **45**(12): p. 1069-1077.
- 26 476 9. Sheehan, D.V., et al., *The Mini-International Neuropsychiatric Interview (MINI): The*  
27 477 *development and validation of a structured diagnostic psychiatric interview for DSM-IV and*  
28 478 *ICD-10.* Journal of Clinical Psychiatry, 1998. **59**: p. 22-33.
- 29 479 10. Beck, A.T., et al., *An Inventory for Measuring Depression.* Archives of General Psychiatry,  
30 480 1961. **4**(6): p. 561-65.
- 31 481 11. Zigmond, A.S. and R.P. Snaith, *The Hospital Anxiety and Depression Scale.* Acta Psychiatrica  
32 482 Scandinavica, 1983. **67**(6): p. 361-370.
- 33 483 12. Parkitny, L. and J. McAuley, *The Depression Anxiety Stress Scale (DASS).* Journal of  
34 484 Physiotherapy, 2010. **56**(3): p. 204-204.
- 35 485 13. Islam, F.M.A., *Psychological distress and its association with socio-demographic factors in a*  
36 486 *rural district in Bangladesh: A cross-sectional study.* Plos One, 2019. **14**(3).
- 37 487 14. Kessler, R.C., et al., *Screening for serious mental illness in the general population.* Archives of  
38 488 General Psychiatry, 2003. **60**(2): p. 184-189.
- 39 489 15. Kessler, R.C., et al., *Short screening scales to monitor population prevalences and trends in*  
40 490 *non-specific psychological distress.* Psychological Medicine, 2002. **32**(6): p. 959-976.
- 41 491 16. Bessaha, M.L., *Factor Structure of the Kessler Psychological Distress Scale (K6) Among*  
42 492 *Emerging Adults.* Research on Social Work Practice, 2017. **27**(5): p. 616-624.
- 43 493 17. Brooks, R.T., J. Beard, and Z. Steel, *Factor structure and interpretation of the K10.*  
44 494 *Psychological Assessment,* 2006. **18**(1): p. 62-70.
- 45 495 18. Uddin, M.N., F.M.A. Islam, and A. Al Mahmud, *Psychometric evaluation of an interview-*  
46 496 *administered version of the Kessler 10-item questionnaire (K10) for measuring psychological*  
47 497 *distress in rural Bangladesh.* Bmj Open, 2018. **8**(6): p. 1-11.
- 48 498 19. Andrews, G. and L. Peters, *The psychometric properties of the composite international*  
49 499 *diagnostic interview.* Social Psychiatry and Psychiatric Epidemiology, 1998. **33**(2): p. 80-88.



- 1  
2 500 20. Kessler, R. and D. Mroczek, *Final versions of our non-specific psychological distress scale*.  
3 501 Memo dated March, 1994. **10**: p. 1994.
- 4 502 21. Slade, T., et al., *2007 National Survey of Mental Health and Wellbeing: methods and key*  
5 503 *findings*. Australian and New Zealand Journal of Psychiatry, 2009. **43**(7): p. 594-605.
- 6 504 22. Kessler, R.C. and T.B. Ustun, *The World Mental Health (WMH) Survey Initiative version of the*  
7 505 *World Health Organization (WHO) Composite International Diagnostic Interview (CIDI)*.  
8 506 International Journal of Methods in Psychiatric Research, 2004. **13**(2): p. 93-121.
- 9 507 23. Andrews, G. and T. Slade, *Interpreting scores on the Kessler Psychological Distress Scale*  
10 508 *(K10)*. Australian and New Zealand Journal of Public Health, 2001. **25**(6): p. 494-497.
- 11 509 24. Furukawa, T.A., et al., *The performance of the K6 and K10 screening scales for psychological*  
12 510 *distress in the Australian National Survey of Mental Health and Well-Being*. Psychological  
13 511 Medicine, 2003. **33**(2): p. 357-362.
- 14 512 25. Kessler, R.C., et al., *Screening for serious mental illness in the general population with the K6*  
15 513 *screening scale: results from the WHO World Mental Health (WMH) survey initiative*.  
16 514 International Journal of Methods in Psychiatric Research, 2010. **19**: p. 4-22.
- 17 515 26. Bank, W. *Bangladesh Current Population*. 2016 [cited 2017 16/8/2017]; Available from:  
18 516 <https://data.worldbank.org/indicator/SP.POP.TOTL?locations=BD>.
- 19 517 27. Bank, W., *World development indicators 2016 (English)*. World Development Indicators.  
20 518 Washington, D.C. : World Bank Group. 2016.
- 21 519 28. Hosain, G.M.M., et al., *Prevalence, pattern and determinants of mental disorders in rural*  
22 520 *Bangladesh*. Public Health, 2007. **121**(1): p. 18-24.
- 23 521 29. Islam, M.M., et al., *Prevalence of psychiatric disorders in an urban community in Bangladesh*.  
24 522 General Hospital Psychiatry, 2003. **25**(5): p. 353-357.
- 25 523 30. Moussavi, S., et al., *Depression, chronic diseases, and decrements in health: results from the*  
26 524 *World Health Surveys*. Lancet, 2007. **370**(9590): p. 851-858.
- 27 525 31. Uddin, M.N., S. Bhar, and F.M.A. Islam, *An assessment of awareness of mental health*  
28 526 *conditions and its association with socio-demographic characteristics: a cross-sectional study*  
29 527 *in a rural district in Bangladesh*. BMC Health Services Research, 2019. **19**(1): p. 562.
- 30 528 32. Hossain, M.D., et al., *Mental disorders in Bangladesh: a systematic review*. BMC Psychiatry,  
31 529 2014. **14**: p. 1-8.
- 32 530 33. Statistics, B.B.o. *Population & Housing Census 2011 (Zila Series & Community Series)*  
33 531 [http://203.112.218.65:8008/WebTestApplication/userfiles/Image/PopCen2011/C\\_Narail.pdf](http://203.112.218.65:8008/WebTestApplication/userfiles/Image/PopCen2011/C_Narail.pdf),  
34 532 Accessed 1 Feb 2017.
- 35 533 34. Agency, C.I. *Adult literacy Rate in Bangladesh, 2015*,  
36 534 <https://www.cia.gov/library/publications/the-world-factbook/geos/bg.html>, Accessed, 2 Jun  
37 535 2017.
- 38 536 35. Ministry of Finance, T.P.R.o.B. *Socio-Economic Indicators of Bangladesh, 2017*,  
39 537 [https://mof.portal.gov.bd/site/page/28ba57f5-59ff-4426-970a-bf014242179e/Bangladesh-](https://mof.portal.gov.bd/site/page/28ba57f5-59ff-4426-970a-bf014242179e/Bangladesh-Economic-Review)  
40 538 [Economic-Review](https://mof.portal.gov.bd/site/page/28ba57f5-59ff-4426-970a-bf014242179e/Bangladesh-Economic-Review), Accessed, 8 June 2017.
- 41 539 36. Smith, A.B., et al., *Rasch fit statistics and sample size considerations for polytomous data*. BMC  
42 540 Medical Research Methodology, 2008. **8**: p. 1-11.
- 43 541 37. Linacre, J.M. *Sample Size and Item Calibration Stability*, 7, p. 328. 1994 [cited 2018  
44 542 24/01/2018]; Available from: [www.rasch.org/rmt/rmt74m.htm](http://www.rasch.org/rmt/rmt74m.htm).
- 45 543 38. Uddin, M.N., et al., *Psychological distress and quality of life: rationale and protocol of a*  
46 544 *prospective cohort study in a rural district in Bangladesh*. Bmj Open, 2017. **7**(9): p. 1-10.
- 47 545 39. Lindhiem, O., et al., *Mobile technology boosts the effectiveness of psychotherapy and*  
48 546 *behavioral interventions: a meta-analysis*. Behavior modification, 2015. **39**(6): p. 785-804.

56

57

59

60

- 1  
2 547 40. Goodspeed, R., et al., *Comparing the Data Quality of Global Positioning System Devices and*  
3 548 *Mobile Phones for Assessing Relationships Between Place, Mobility, and Health: Field Study.*  
4 549 Jmir Mhealth and Uhealth, 2018. **6**(8).
- 5 550 41. Deussom, R.H., M. Mitchell, and J.D. Ruben, *Using Mobile Technology to Address the 'Three*  
6 551 *Delays' to Reduce Maternal Mortality in Zanzibar*, in *E-Health and Telemedicine: Concepts,*  
7 552 *Methodologies, Tools, and Applications.* 2016, IGI Global. p. 1140-1154.
- 8 553 42. Svoronos, T., et al., *CommCare: Automated quality improvement to strengthen community-*  
9 554 *based health.* Weston: D-Tree International, 2010.
- 10 555 43. Bogan, M., et al. *Improving standards of care with mobile applications in Tanzania.* in *W3C*  
11 556 *Workshop on the Role of Mobile Technologies in Fostering Social and Economic Development*  
12 557 *in Africa.* 2009.
- 13 558 44. DIMAGI. *CoomCare.* 2018 [cited 2018 25/05/2018]; Available from:  
14 559 <https://www.dimagi.com/commcare/>.
- 15 560 45. Rasch, G., *An Item Analysis Which Takes Individual Differences into Account.* British Journal  
16 561 of Mathematical & Statistical Psychology, 1966. **19**: p. 49-57.
- 17 562 46. Andrich, D., *Rating Formulation for Ordered Response Categories.* Psychometrika, 1978.  
18 563 **43**(4): p. 561-573.
- 19 564 47. Andrich, D., B. Sheridan, and G. Luo, *Rasch models for measurement: RUMM2030.* Perth,  
20 565 Western Australia: RUMM Laboratory Pty Ltd, 2010.
- 21 566 48. Pallant, J.F. and A. Tennant, *An introduction to the Rasch measurement model: An example*  
22 567 *using the Hospital Anxiety and Depression Scale (HADS).* British Journal of Clinical  
23 568 Psychology, 2007. **46**: p. 1-18.
- 24 569 49. RUMM2030, *RUMM2030 For analysing assessment and attitude questionnaire data.* 2017.
- 25 570 50. Alan Tennant and P.G. Conaghan, *The Rasch Measurement Model in Rheumatology: What Is It*  
26 571 *and Why Use It? When Should It Be Applied, and What Should One Look for in a Rasch Paper?*  
27 572 2007.
- 28 573 51. Gerbing, D.W. and J.C. Anderson, *An Updated Paradigm for Scale Development Incorporating*  
29 574 *Unidimensionality and Its Assessment.* Journal of Marketing Research, 1988. **25**(2): p. 186-192.
- 30 575 52. Engelhard, G., *Rasch Models for Measurement - Andrich, D.* Applied Psychological  
31 576 Measurement, 1988. **12**(4): p. 435-436.
- 32 577 53. Leon, A.C., *Multiplicity-adjusted sample size requirements: A strategy to maintain statistical*  
33 578 *power with Bonferroni adjustments.* Journal of Clinical Psychiatry, 2004. **65**(11): p. 1511-1514.
- 34 579 54. Bland, J.M. and D.G. Altman, *Multiple Significance Tests - the Bonferroni Method .10.* British  
35 580 Medical Journal, 1995. **310**(6973): p. 170-170.
- 36 581 55. Kowalski, A. and P. Enck, *Statistical Methods: Multiple Significance Tests and the Bonferroni*  
37 582 *Procedure.* Psychotherapie Psychosomatik Medizinische Psychologie, 2010. **60**(7): p. 286-287.
- 38 583 56. Pomeroy, I.M., A. Tennant, and C.A. Young, *Rasch Analysis of the Whoqol-Bref in Post Polio*  
39 584 *Syndrome.* Journal of Rehabilitation Medicine, 2013. **45**(9): p. 873-880.
- 40 585 57. Bond, T.G. and C.M. Fox, *Applying the Rasch model : fundamental measurement in the human*  
41 586 *sciences.* 2nd ed. 2007, Mahwah, N.J.: Lawrence Erlbaum Associates Publishers. 340 p.
- 42 587 58. Linacre, J.M., *Optimizing rating scale category effectiveness.* J Appl Meas, 2002. **3**(1): p. 85-  
43 588 106.
- 44 589 59. Brentani, E. and S. Golia, *Unidimensionality in the Rasch model: how to detect and interpret.*  
45 590 *Statistical and Methodological Myths and Urban Legends,* 2007. **67**(3): p. 1-9.
- 46 591 60. Tennant, A. and J.F. Pallant, *DIF matters: A practical approach to test if Differential Item*  
47 592 *Functioning makes a difference.* Rasch Measurement Transactions, 2007. **24**(2): p. 1082-84.
- 48 593 61. Smith, R.M., *Fit analysis in latent trait measurement models.* J Appl Meas, 2000. **1**(2): p. 199-  
49 594 218.

- 1  
2 595 62. Andrich, D., et al., *RUMM: A windows-based item analysis program employing Rasch*  
3 596 *unidimensional measurement models*. Perth, Australia: Murdoch University, 2000.
- 4 597 63. Romanoski, J. and G. Douglas, *Test scores, measurement, and the use of analysis of variance:*  
5 598 *an historical overview*. J Appl Meas, 2002. **3**(3): p. 232-42.
- 6 599 64. Anderson, T.M., et al., *The 10-Item Kessler Psychological Distress Scale (K10) as a Screening*  
8 600 *Instrument in Older Individuals*. American Journal of Geriatric Psychiatry, 2013. **21**(7): p. 596-  
9 601 606.
- 10 602 65. Browne, M.A.O., et al., *The Kessler Psychological Distress Scale in Te Rau Hinengaro: the*  
11 603 *New Zealand Mental Health Survey*. Australian and New Zealand Journal of Psychiatry, 2010.  
12 604 **44**(4): p. 314-322.
- 13 605 66. Fassaert, T., et al., *Psychometric properties of an interviewer-administered version of the*  
14 606 *Kessler Psychological Distress scale (K10) among Dutch, Moroccan and Turkish respondents*.  
15 607 International Journal of Methods in Psychiatric Research, 2009. **18**(3): p. 159-168.
- 16 607 67. Nguyen, L., et al., *Psychological distress measured using the Kessler scale (K6) predicts long-*  
17 608 *term postoperative pain after wrist surgery*. Canadian Journal of Anesthesia-Journal Canadien  
18 609 D Anesthesie, 2012. **59**(12): p. 1150-1151.
- 19 610 68. Mitchell, C.M. and J. Beals, *The Utility of the Kessler Screening Scale for Psychological*  
20 611 *Distress (K6) in Two American Indian Communities*. Psychological Assessment, 2011. **23**(3): p.  
21 612 752-761.
- 22 613 69. Furukawa, T.A., et al., *The performance of the Japanese version of the K6 and K10 in the*  
23 614 *World Mental Health Survey Japan*. International Journal of Methods in Psychiatric Research,  
24 615 2008. **17**(3): p. 152-158.
- 25 615 70. Easton, S.D., et al., *The Kessler psychological distress scale: translation and validation of an*  
26 616 *Arabic version*. Health and Quality of Life Outcomes, 2017. **15**.
- 27 617 71. Bu, X.Q., et al., *Psychometric Properties of the Kessler 10 Scale in Chinese Parents of*  
28 618 *Children With Cancer*. Cancer Nursing, 2017. **40**(4): p. 297-304.
- 29 619 72. Eaton, N.R., et al., *An invariant dimensional liability model of gender differences in mental*  
30 620 *disorder prevalence: evidence from a national sample*. J Abnorm Psychol, 2012. **121**(1): p.  
31 621 282-8.
- 32 622 73. Baillie, A.J., *Predictive gender and education bias in Kessler's psychological distress Scale*  
33 623 *(K10)*. Social Psychiatry and Psychiatric Epidemiology, 2005. **40**(9): p. 743-748.
- 34 624 74. Plaisier, I., et al., *Work and family roles and the association with depressive and anxiety*  
35 625 *disorders: Differences between men and women*. Journal of Affective Disorders, 2008. **105**(1-  
36 626 3): p. 63-72.
- 37 627 75. Miech, R., C. Power, and W.W. Eaton, *Disparities in psychological distress across education*  
38 628 *and sex: a longitudinal analysis of their persistence within a cohort over 19 years*. Annals of  
39 629 Epidemiology, 2007. **17**(4): p. 289-295.
- 40 630 76. Andrews, G., S. Henderson, and W. Hall, *Prevalence, comorbidity, disability and service*  
41 631 *utilisation - Overview of the Australian National Mental Health Survey*. British Journal of  
42 632 Psychiatry, 2001. **178**: p. 145-153.
- 43 633 77. Pratt, L.A., A.N. Dey, and A.J. Cohen, *Characteristics of adults with serious psychological*  
44 634 *distress as measured by the K6 scale, United States, 2001-04*. 2007.
- 45 635 78. Fushimi, M., et al., *Prevalence of Psychological Distress, as Measured by the Kessler 6 (K6),*  
46 636 *and Related Factors in Japanese Employees*. Community Mental Health Journal, 2012. **48**(3):  
47 637 p. 328-335.
- 48 638 79. Feinson, M.C., *Are Psychological Disorders Most Prevalent among Older Adults - Examining*  
49 639 *the Evidence*. Social Science & Medicine, 1989. **29**(10): p. 1175-1181.
- 50 640 80. Newmann, J.P., *Aging and Depression*. Psychology and Aging, 1989. **4**(2): p. 150-165.
- 51 641  
52 642  
53 643  
54 644  
55 645  
56 646  
57  
58  
59  
60

- 1  
2 643 81. Roberts, R.E., *Reliability of the CES-D Scale in different ethnic contexts*. Psychiatry Res, 1980.  
3 644 2(2): p. 125-34.
- 4 645 82. Kessler, R.C., Foster, C., Webster, P. S., & House, J. S., *The relationship between age and*  
5 646 *depressive symptoms in two national surveys*. Psychology and Aging, 1992. 7(1): p. 119-126.
- 6 647 83. Uddin, M.N. and F.M.A. Islam, *Psychometric evaluation of an interview-administered version*  
7 648 *of the WHOQOL-BREF questionnaire for use in a cross-sectional study of a rural district in*  
8 649 *Bangladesh: an application of Rasch analysis*. BMC Health Services Research, 2019. 19(1): p.  
9 650 216.
- 10 651 84. Kessler, R.C., *A disaggregation of the relationship between socioeconomic status and*  
11 652 *psychological distress*. American Sociological Review, 1982: p. 752-764.
- 12 653 85. Kosidou, K., et al., *Socioeconomic status and risk of psychological distress and depression in*  
13 654 *the Stockholm Public Health Cohort: A population-based study*. Journal of Affective Disorders,  
14 655 2011. 134(1-3): p. 160-167.
- 15 656 86. Smith, A.B., et al., *Rasch fit statistics and sample size considerations for polytomous data*.  
16 657 BMC Med Res Methodol, 2008. 8: p. 33.
- 17 658 87. Andrich, D., *Understanding the Response Structure and Process in the Polytomous Rasch*  
18 659 *Model*. Handbook of Polytomous Item Response Theory Models, 2010: p. 123-152.
- 19 660 88. Andrich, D. and I. Marais, *A course in Rasch measurement theory: Measuring in the*  
20 661 *educational, social and health sciences*. 2019: Springer.
- 21 662

22 663 **Fig. 1** The study location that includes a geographic area and data collection points

23 664 **Fig. 2** Threshold maps of the K7 scale

24 665 **Fig. 3** Category probability curve of all the items of the K7 scale

25 666 **Fig. 4** Dimensionality testing of the K7 scale

26 667 **Fig. 5** Person item threshold distribution map of the K7 scale.



Fig. 1 The study location that includes a geographic area and data collection points

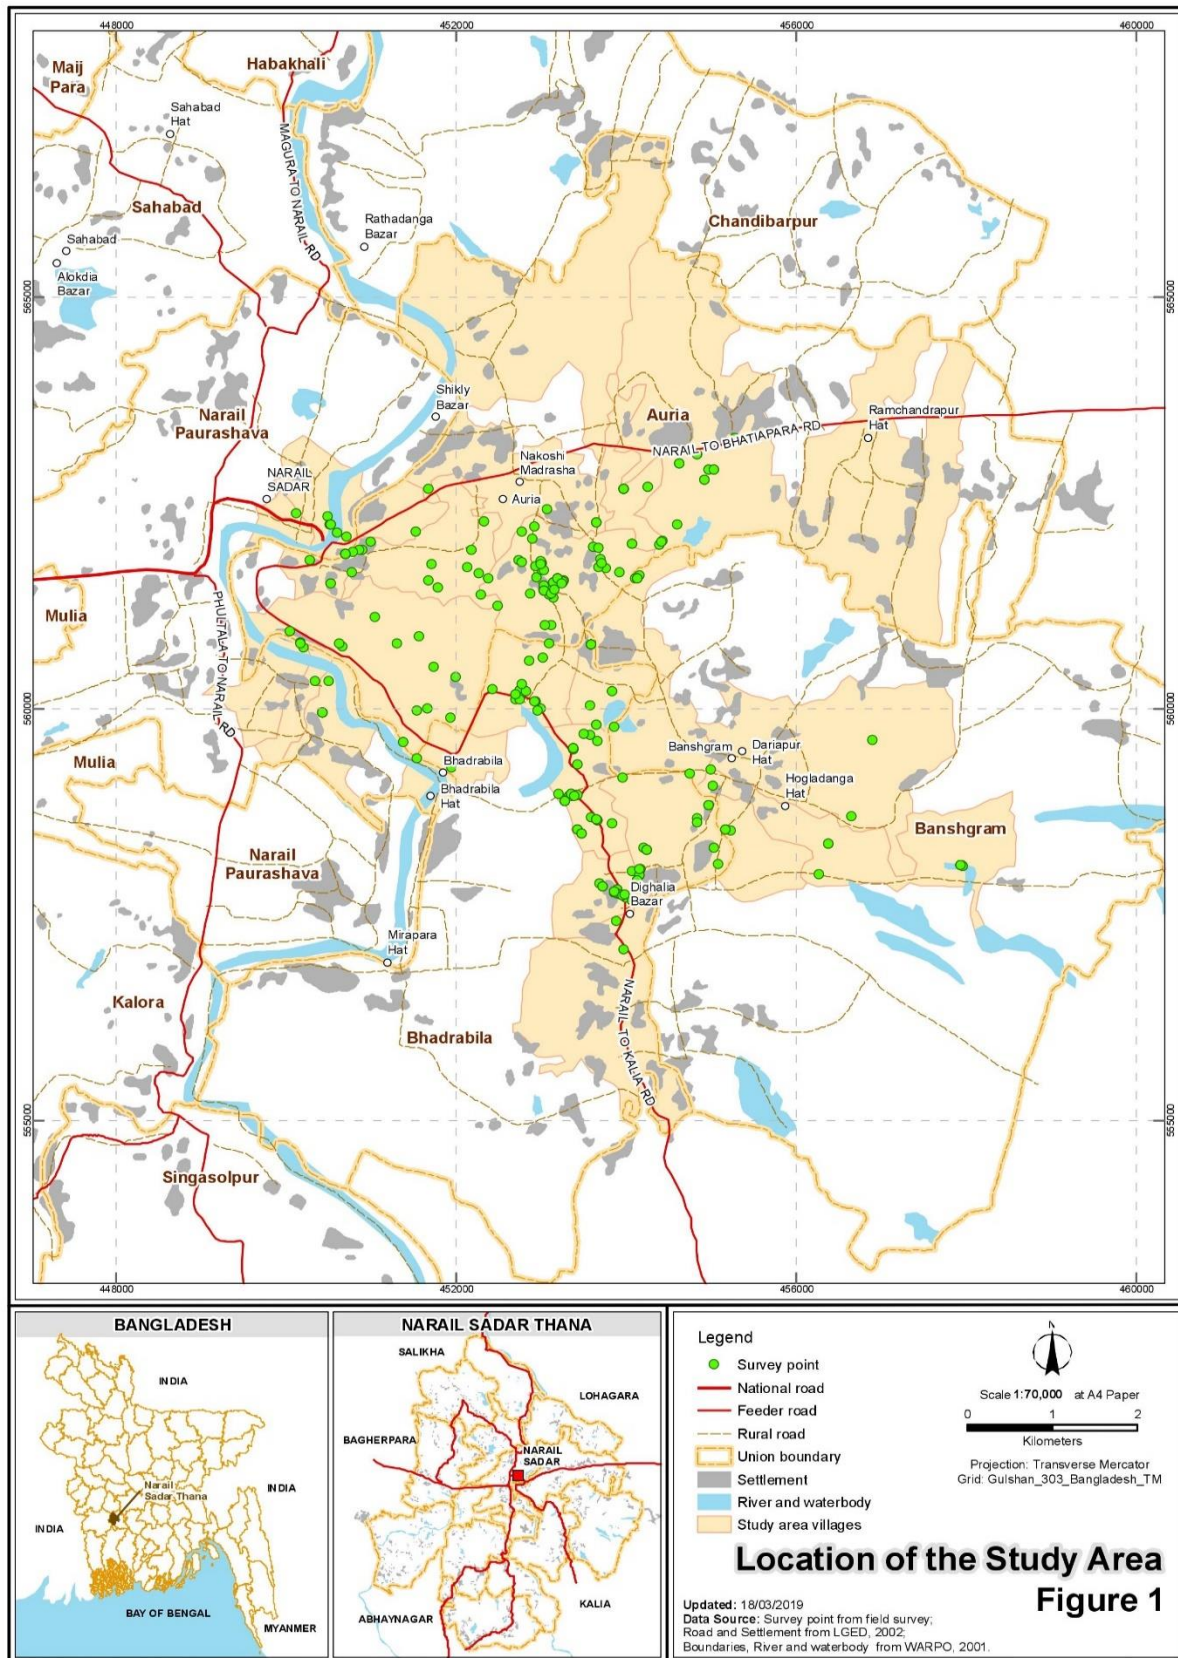

**Fig. 2 Threshold maps of the K7 scale**

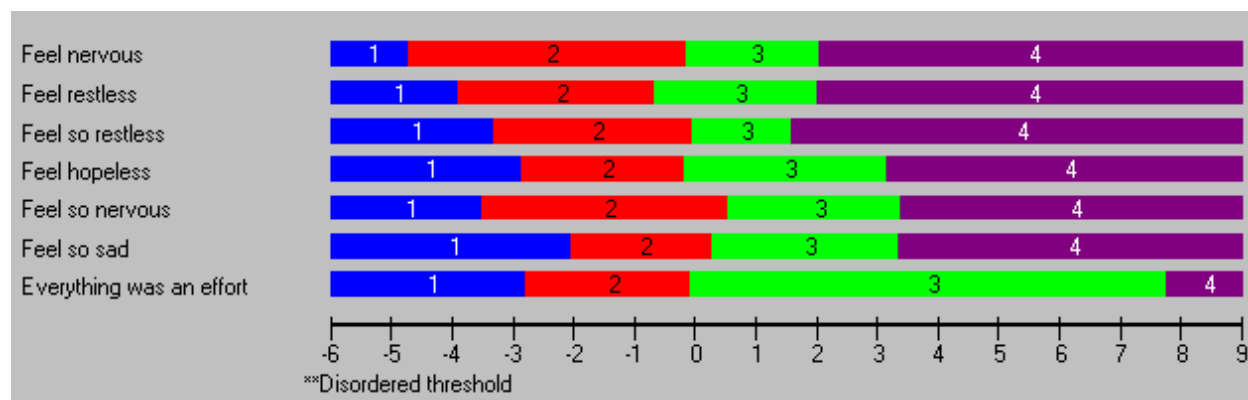

Or peer review only

Fig. 3 Category probability curve of all the items of K7 scale

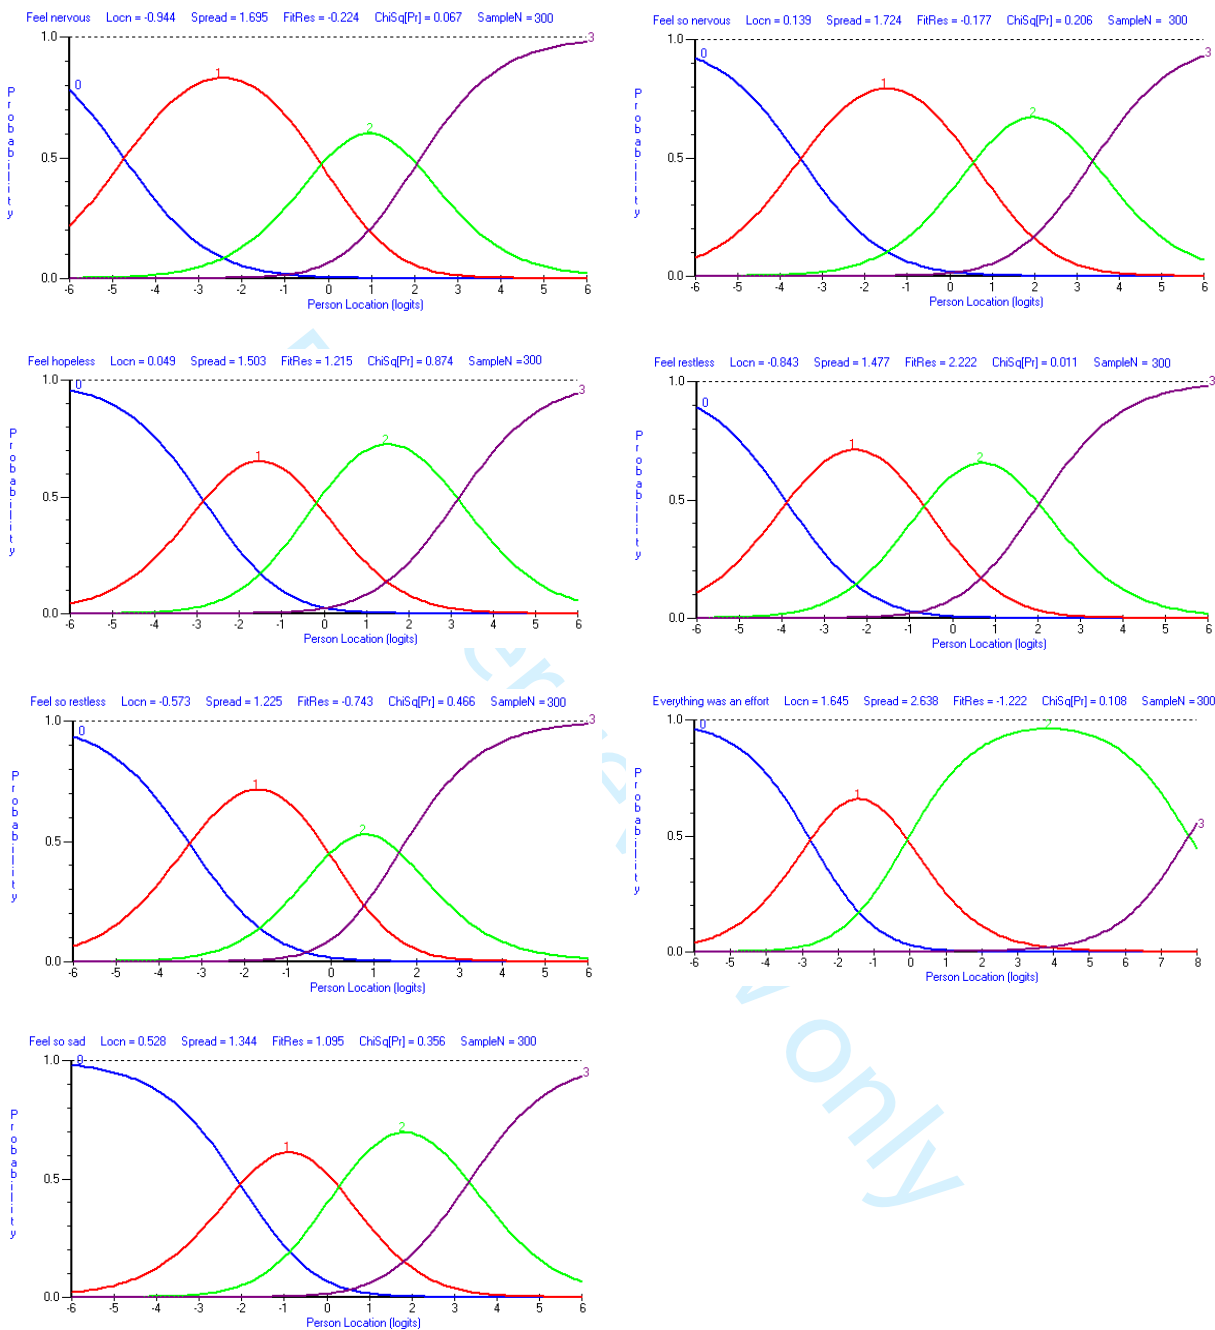



Fig. 4 Dimensionality testing of the K7 scale

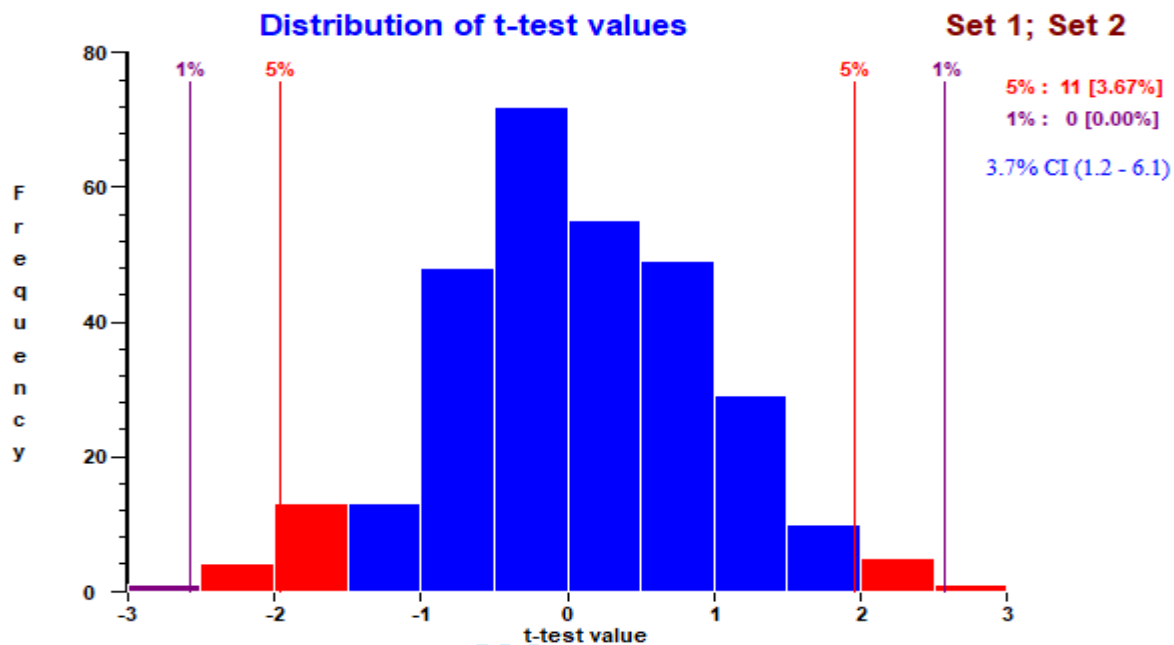

er review only

Fig. 5 Person item threshold distribution map of the K7 scale.

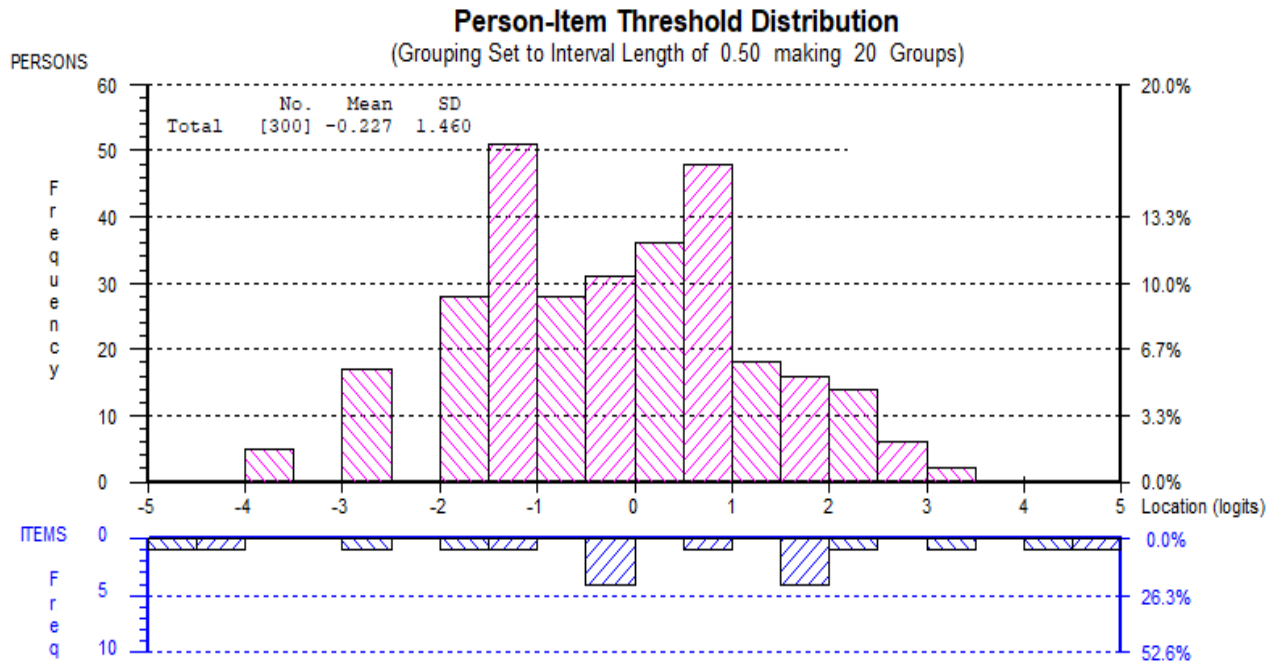

review only

**Consent Form:**

Interviewer note: Should be completed from one of the eligible members of aged  $\geq 18$  years

**Patient's consent**

We are screening to identify people with depression and its risk factors, in people of aged  $\geq 18$  years. The survey will increase your awareness of the disease outcome and its risk factors. The community will be benefitted from this study through the intervention programs those the Organisation for Rural Community Development intend to conduct in the future. We do not expect any risk for you if you participate in this study. Upon the completion, the results will be published in both national and international Journal, but your individual information will be kept confidential and your identification will not be disclosed. We expect to continue our study for a longer period for which we may invite you again to participate in our study. However, you are free to change your mind and can withdraw from the study anytime without any obligation if you want.

Please provide your signature or thumb imprint if you agree

Signature/thumb imprint

Signature by the interviewer if the participant cannot provide signature.

**Appendix** Residuals correlation matrix of the K7 scale

| Items                        | Feel nervous (2) | Feel so nervous (3) | Feel hopeless (4) | Feel restless (5) | Feel so restless (6) | Everything was an effort (8) | Feel so sad (9) |
|------------------------------|------------------|---------------------|-------------------|-------------------|----------------------|------------------------------|-----------------|
| Feel nervous (2)             | 1                |                     |                   |                   |                      |                              |                 |
| Feel so nervous (3)          | 0.278            | 1                   |                   |                   |                      |                              |                 |
| Feel hopeless (4)            | -0.128           | -0.191              | 1                 |                   |                      |                              |                 |
| Feel restless (5)            | -0.284           | -0.298              | -0.204            | 1                 |                      |                              |                 |
| Feel so restless (6)         | -0.276           | -0.188              | -0.240            | 0.032             | 1                    |                              |                 |
| Everything was an effort (8) | -0.254           | -0.228              | -0.142            | -0.193            | -0.142               | 1                            |                 |
| Feel so sad (9)              | -0.183           | -0.213              | -0.125            | -0.253            | -0.215               | 0.039                        | 1               |

**STROBE 2007 Statement—Checklist of items that should be included in reports of *cross-sectional studies***

| Section/Topic             | Item # | Recommendation                                                                                                                                                                       | Reported on page #                                                                                                                                 |
|---------------------------|--------|--------------------------------------------------------------------------------------------------------------------------------------------------------------------------------------|----------------------------------------------------------------------------------------------------------------------------------------------------|
| Title and abstract        | 1      | (a) Indicate the study's design with a commonly used term in the title or the abstract                                                                                               | Pages 1-3                                                                                                                                          |
|                           |        | (b) Provide in the abstract an informative and balanced summary of what was done and what was found                                                                                  | Pages 2-3                                                                                                                                          |
| <b>Introduction</b>       |        |                                                                                                                                                                                      |                                                                                                                                                    |
| Background/rationale      | 2      | Explain the scientific background and rationale for the investigation being reported                                                                                                 | Page 4, background                                                                                                                                 |
| Objectives                | 3      | State specific objectives, including any prespecified hypotheses                                                                                                                     | Page 6, paragraph 2                                                                                                                                |
| <b>Methods</b>            |        |                                                                                                                                                                                      |                                                                                                                                                    |
| Study design              | 4      | Present key elements of study design early in the paper                                                                                                                              | Page 6 , sampling frame                                                                                                                            |
| Setting                   | 5      | Describe the setting, locations, and relevant dates, including periods of recruitment, exposure, follow-up, and data collection                                                      | Page 6, study population                                                                                                                           |
| Participants              | 6      | (a) Give the eligibility criteria, and the sources and methods of selection of participants                                                                                          | Pages 7-8, sample size and statistical power and sample frame, data collection using CommCare and also more details in the protocol paper (ref 38) |
| Variables                 | 7      | Clearly define all outcomes, exposures, predictors, potential confounders, and effect modifiers. Give diagnostic criteria, if applicable                                             | Page 9 Outcome measure and socio-economic variables                                                                                                |
| Data sources/ measurement | 8*     | For each variable of interest, give sources of data and details of methods of assessment (measurement). Describe comparability of assessment methods if there is more than one group | Pages 8-11                                                                                                                                         |
| Bias                      | 9      | Describe any efforts to address potential sources of bias                                                                                                                            |                                                                                                                                                    |
| Study size                | 10     | Explain how the study size was arrived at                                                                                                                                            | Page 7, sample size and statistical power                                                                                                          |
| Quantitative variables    | 11     | Explain how quantitative variables were handled in the analyses. If applicable, describe which groupings were chosen and why                                                         | Pages 8-9, the Rasch model                                                                                                                         |
| Statistical methods       | 12     | (a) Describe all statistical methods, including those used to control for confounding                                                                                                | Pages 9-11, the Rasch model                                                                                                                        |
|                           |        | (b) Describe any methods used to examine subgroups and interactions                                                                                                                  | Pages 9-11, the Rasch model                                                                                                                        |
|                           |        | (c) Explain how missing data were addressed                                                                                                                                          | N/A                                                                                                                                                |
|                           |        | (d) If applicable, describe analytical methods taking account of sampling strategy                                                                                                   | Pages 7-8, sampling frame and In protocol paper (ref 27)                                                                                           |
|                           |        | (e) Describe any sensitivity analyses                                                                                                                                                |                                                                                                                                                    |

|    |                          |     |                                                                                                                                                                                                              |                                                     |
|----|--------------------------|-----|--------------------------------------------------------------------------------------------------------------------------------------------------------------------------------------------------------------|-----------------------------------------------------|
| 1  | <b>Results</b>           |     |                                                                                                                                                                                                              |                                                     |
| 2  | Participants             | 13* | (a) Report numbers of individuals at each stage of study—eg numbers potentially eligible, examined for eligibility, confirmed eligible, included in the study, completing follow-up, and analysed            | Pages 11-12                                         |
| 3  |                          |     | (b) Give reasons for non-participation at each stage                                                                                                                                                         | N/A                                                 |
| 4  |                          |     | (c) Consider use of a flow diagram                                                                                                                                                                           | N/A                                                 |
| 5  | Descriptive data         | 14* | (a) Give characteristics of study participants (eg demographic, clinical, social) and information on exposures and potential confounders                                                                     | Table 1, Overview of respondents and on pages 11-12 |
| 6  |                          |     | (b) Indicate number of participants with missing data for each variable of interest                                                                                                                          |                                                     |
| 7  | Outcome data             | 15* | Report numbers of outcome events or summary measures                                                                                                                                                         | Page 12-15                                          |
| 8  | Main results             | 16  | (a) Give unadjusted estimates and, if applicable, confounder-adjusted estimates and their precision (eg, 95% confidence interval). Make clear which confounders were adjusted for and why they were included | Page 12-15, Table 2-5                               |
| 9  |                          |     | (b) Report category boundaries when continuous variables were categorized                                                                                                                                    | N/A                                                 |
| 10 |                          |     | (c) If relevant, consider translating estimates of relative risk into absolute risk for a meaningful time period                                                                                             |                                                     |
| 11 | Other analyses           | 17  | Report other analyses done—eg analyses of subgroups and interactions, and sensitivity analyses                                                                                                               |                                                     |
| 12 | <b>Discussion</b>        |     |                                                                                                                                                                                                              |                                                     |
| 13 | Key results              | 18  | Summarise key results with reference to study objectives                                                                                                                                                     | Page 15, Discussion, paragraph 1 and 2              |
| 14 | Limitations              | 19  | Discuss limitations of the study, taking into account sources of potential bias or imprecision. Discuss both direction and magnitude of any potential bias                                                   | Page 18, Paragraph 1                                |
| 15 | Interpretation           | 20  | Give a cautious overall interpretation of results considering objectives, limitations, multiplicity of analyses, results from similar studies, and other relevant evidence                                   | Pages 15-18                                         |
| 16 | Generalisability         | 21  | Discuss the generalisability (external validity) of the study results                                                                                                                                        | Page 18, Conclusion                                 |
| 17 | <b>Other information</b> |     |                                                                                                                                                                                                              |                                                     |
| 18 | Funding                  | 22  | Give the source of funding and the role of the funders for the present study and, if applicable, for the original study on which the present article is based                                                | Page 19, Funding                                    |

\*Give information separately for cases and controls in case-control studies and, if applicable, for exposed and unexposed groups in cohort and cross-sectional studies.

**Note:** An Explanation and Elaboration article discusses each checklist item and gives methodological background and published examples of transparent reporting. The STROBE checklist is best used in conjunction with this article (freely available on the Web sites of PLoS Medicine at <http://www.plosmedicine.org/>, Annals of Internal Medicine at <http://www.annals.org/>, and Epidemiology at <http://www.epidem.com/>). Information on the STROBE Initiative is available at [www.strobe-statement.org](http://www.strobe-statement.org).
